# Supplementary material for: Using multi-label ensemble CNN classifiers to mitigate labelling inconsistencies in patch-level Gleason grading
Source: PubMed Central journal article supplement (PMC11226137; doi:10.1371/journal.pone.0304847), 2024-07-05
Supplement: pone.0304847.s001.pdf [file pone.0304847.s001.pdf]

# PLOS ONE

## Using Multi-Label Ensemble CNN Classifiers to Mitigate Labelling Inconsistencies in Patch-level Gleason Grading --Manuscript Draft--

|                                                                                                                                                                                                                                                                                          |                                                                                                                                                                                                                                                                                                                                                                                                                                                                                                                                                                                                                                                                                                                                                                                                                                                                                                                                                                                                                                                                                                                                                                                                                                                                                                                                                                                                                                                                            |
|------------------------------------------------------------------------------------------------------------------------------------------------------------------------------------------------------------------------------------------------------------------------------------------|----------------------------------------------------------------------------------------------------------------------------------------------------------------------------------------------------------------------------------------------------------------------------------------------------------------------------------------------------------------------------------------------------------------------------------------------------------------------------------------------------------------------------------------------------------------------------------------------------------------------------------------------------------------------------------------------------------------------------------------------------------------------------------------------------------------------------------------------------------------------------------------------------------------------------------------------------------------------------------------------------------------------------------------------------------------------------------------------------------------------------------------------------------------------------------------------------------------------------------------------------------------------------------------------------------------------------------------------------------------------------------------------------------------------------------------------------------------------------|
| <b>Manuscript Number:</b>                                                                                                                                                                                                                                                                | PONE-D-24-08473                                                                                                                                                                                                                                                                                                                                                                                                                                                                                                                                                                                                                                                                                                                                                                                                                                                                                                                                                                                                                                                                                                                                                                                                                                                                                                                                                                                                                                                            |
| <b>Article Type:</b>                                                                                                                                                                                                                                                                     | Research Article                                                                                                                                                                                                                                                                                                                                                                                                                                                                                                                                                                                                                                                                                                                                                                                                                                                                                                                                                                                                                                                                                                                                                                                                                                                                                                                                                                                                                                                           |
| <b>Full Title:</b>                                                                                                                                                                                                                                                                       | Using Multi-Label Ensemble CNN Classifiers to Mitigate Labelling Inconsistencies in Patch-level Gleason Grading                                                                                                                                                                                                                                                                                                                                                                                                                                                                                                                                                                                                                                                                                                                                                                                                                                                                                                                                                                                                                                                                                                                                                                                                                                                                                                                                                            |
| <b>Short Title:</b>                                                                                                                                                                                                                                                                      | Gleason Grading through Multi-Label Ensemble CNN Classifier                                                                                                                                                                                                                                                                                                                                                                                                                                                                                                                                                                                                                                                                                                                                                                                                                                                                                                                                                                                                                                                                                                                                                                                                                                                                                                                                                                                                                |
| <b>Corresponding Author:</b>                                                                                                                                                                                                                                                             | Muhammad Bilal, Ph.D.<br>King Abdulaziz University Faculty of Engineering<br>Jeddah, SAUDI ARABIA                                                                                                                                                                                                                                                                                                                                                                                                                                                                                                                                                                                                                                                                                                                                                                                                                                                                                                                                                                                                                                                                                                                                                                                                                                                                                                                                                                          |
| <b>Keywords:</b>                                                                                                                                                                                                                                                                         | Machine Learning; Image Recognition; Multi-Label Classification; Convolutional Neural Networks; Gleason Grading.                                                                                                                                                                                                                                                                                                                                                                                                                                                                                                                                                                                                                                                                                                                                                                                                                                                                                                                                                                                                                                                                                                                                                                                                                                                                                                                                                           |
| <b>Abstract:</b>                                                                                                                                                                                                                                                                         | <p>This paper presents a novel approach to enhance the accuracy of patch-level Gleason grading in prostate histopathology images, a critical task in the diagnosis and prognosis of prostate cancer. This study shows that the Gleason grading accuracy can be improved by addressing the prevalent issue of label inconsistencies in the SICAPv2 prostate dataset, which employs a majority voting scheme for patch-level labels. We propose a multi-label ensemble deep-learning classifier that effectively mitigates these inconsistencies and yields more accurate results than the state-of-the-art works. Specifically, our approach leverages the strengths of three different one-vs-all deep learning models in an ensemble to learn diverse features from the histopathology images to individually indicate the presence of one or more Gleason grades (G3, G4, and G5) in each patch. These deep learning models have been trained using transfer learning to fine-tune a variant of the ResNet18 CNN classifier chosen after an extensive ablation study. Experimental results demonstrate that our multi-label ensemble classifier significantly outperforms traditional single-label classifiers reported in the literature by at least 14% and 4% on accuracy and f1-score metrics respectively. These results underscore the potential of our proposed machine learning approach to improve the accuracy and consistency of prostate cancer grading.</p> |
| <b>Order of Authors:</b>                                                                                                                                                                                                                                                                 | Muhammad Asim Butt<br>Muhammad Farhat Kaleem<br>Muhammad Bilal, Ph.D.<br>Muhammad Shehzad Hanif                                                                                                                                                                                                                                                                                                                                                                                                                                                                                                                                                                                                                                                                                                                                                                                                                                                                                                                                                                                                                                                                                                                                                                                                                                                                                                                                                                            |
| <b>Additional Information:</b>                                                                                                                                                                                                                                                           |                                                                                                                                                                                                                                                                                                                                                                                                                                                                                                                                                                                                                                                                                                                                                                                                                                                                                                                                                                                                                                                                                                                                                                                                                                                                                                                                                                                                                                                                            |
| <b>Question</b>                                                                                                                                                                                                                                                                          | <b>Response</b>                                                                                                                                                                                                                                                                                                                                                                                                                                                                                                                                                                                                                                                                                                                                                                                                                                                                                                                                                                                                                                                                                                                                                                                                                                                                                                                                                                                                                                                            |
| <b>Financial Disclosure</b>                                                                                                                                                                                                                                                              | Yes                                                                                                                                                                                                                                                                                                                                                                                                                                                                                                                                                                                                                                                                                                                                                                                                                                                                                                                                                                                                                                                                                                                                                                                                                                                                                                                                                                                                                                                                        |
| Enter a financial disclosure statement that describes the sources of funding for the work included in this submission. Review the <a href="#">submission guidelines</a> for detailed requirements. View published research articles from <a href="#">PLOS ONE</a> for specific examples. |                                                                                                                                                                                                                                                                                                                                                                                                                                                                                                                                                                                                                                                                                                                                                                                                                                                                                                                                                                                                                                                                                                                                                                                                                                                                                                                                                                                                                                                                            |
| This statement is required for submission and <b>will appear in the published article</b> if                                                                                                                                                                                             |                                                                                                                                                                                                                                                                                                                                                                                                                                                                                                                                                                                                                                                                                                                                                                                                                                                                                                                                                                                                                                                                                                                                                                                                                                                                                                                                                                                                                                                                            |

the submission is accepted. Please make sure it is accurate.

**Funded studies**

Enter a statement with the following details:

- Initials of the authors who received each award
- Grant numbers awarded to each author
- The full name of each funder
- URL of each funder website
- Did the sponsors or funders play any role in the study design, data collection and analysis, decision to publish, or preparation of the manuscript?

Did you receive funding for this work?

Please add funding details. as follow-up to "**Financial Disclosure**

Enter a financial disclosure statement that describes the sources of funding for the work included in this submission. Review the [submission guidelines](#) for detailed requirements. View published research articles from [PLOS ONE](#) for specific examples.

This statement is required for submission and **will appear in the published article** if the submission is accepted. Please make sure it is accurate.

**Funded studies**

Enter a statement with the following details:

- Initials of the authors who received each award
- Grant numbers awarded to each author
- The full name of each funder
- URL of each funder website
- Did the sponsors or funders play any role in the study design, data collection and analysis, decision to publish, or preparation of the manuscript?

Did you receive funding for this work?"

Please select the country of your main

This research work was funded by Institutional Fund Projects under grant no. (IFPIP: 1825-135-1443). The au-thors gratefully acknowledge technical and financial support provided by the Ministry of Education and King Abdulaziz University, DSR, Jeddah, Saudi Arabia.

SAUDI ARABIA - SA

research funder (please select carefully as in some cases this is used in fee calculation).

as follow-up to "**Financial Disclosure**

Enter a financial disclosure statement that describes the sources of funding for the work included in this submission. Review the [submission guidelines](#) for detailed requirements. View published research articles from [PLOS ONE](#) for specific examples.

This statement is required for submission and **will appear in the published article** if the submission is accepted. Please make sure it is accurate.

#### Funded studies

Enter a statement with the following details:

- Initials of the authors who received each award
- Grant numbers awarded to each author
- The full name of each funder
- URL of each funder website
- Did the sponsors or funders play any role in the study design, data collection and analysis, decision to publish, or preparation of the manuscript?

Did you receive funding for this work?"

#### Competing Interests

Use the instructions below to enter a competing interest statement for this submission. On behalf of all authors, disclose any [competing interests](#) that could be perceived to bias this work—acknowledging all financial support and any other relevant financial or non-financial competing interests.

This statement is **required** for submission and **will appear in the published article** if the submission is accepted. Please make sure it is accurate and that any funding sources listed in your Funding Information

The authors have declared that no competing interests exist.

later in the submission form are also declared in your Financial Disclosure statement.

View published research articles from [PLOS ONE](#) for specific examples.

**NO authors have competing interests**

Enter: *The authors have declared that no competing interests exist.*

**Authors with competing interests**

Enter competing interest details beginning with this statement:

*I have read the journal's policy and the authors of this manuscript have the following competing interests: [insert competing interests here]*

\* typeset

**Ethics Statement**

N/A

Enter an ethics statement for this submission. This statement is required if the study involved:

- Human participants
- Human specimens or tissue
- Vertebrate animals or cephalopods
- Vertebrate embryos or tissues
- Field research

Write "N/A" if the submission does not require an ethics statement.

General guidance is provided below. Consult the [submission guidelines](#) for detailed instructions. **Make sure that all information entered here is included in the Methods section of the manuscript.**

**Format for specific study types**

**Human Subject Research (involving human participants and/or tissue)**

- Give the name of the institutional review board or ethics committee that approved the study
- Include the approval number and/or a statement indicating approval of this research
- Indicate the form of consent obtained (written/oral) or the reason that consent was not obtained (e.g. the data were analyzed anonymously)

**Animal Research (involving vertebrate animals, embryos or tissues)**

- Provide the name of the Institutional Animal Care and Use Committee (IACUC) or other relevant ethics board that reviewed the study protocol, and indicate whether they approved this research or granted a formal waiver of ethical approval
- Include an approval number if one was obtained
- If the study involved *non-human primates*, add *additional details* about animal welfare and steps taken to ameliorate suffering
- If anesthesia, euthanasia, or any kind of animal sacrifice is part of the study, include briefly which substances and/or methods were applied

**Field Research**

Include the following details if this study involves the collection of plant, animal, or other materials from a natural setting:

- Field permit number
- Name of the institution or relevant body that granted permission

**Data Availability**

Authors are required to make all data underlying the findings described fully available, without restriction, and from the time of publication. PLOS allows rare exceptions to address legal and ethical concerns. See the [PLOS Data Policy](#) and [FAQ](#) for detailed information.

Yes - all data are fully available without restriction

A Data Availability Statement describing where the data can be found is required at submission. Your answers to this question constitute the Data Availability Statement and **will be published in the article**, if accepted.

**Important:** Stating 'data available on request from the author' is not sufficient. If your data are only available upon request, select 'No' for the first question and explain your exceptional situation in the text box.

Do the authors confirm that all data underlying the findings described in their manuscript are fully available without restriction?

**Describe where the data may be found in full sentences. If you are copying our sample text, replace any instances of XXX with the appropriate details.**

- If the data are **held or will be held in a public repository**, include URLs, accession numbers or DOIs. If this information will only be available after acceptance, indicate this by ticking the box below. For example: *All XXX files are available from the XXX database (accession number(s) XXX, XXX).*
- If the data are all contained **within the manuscript and/or Supporting Information files**, enter the following: *All relevant data are within the manuscript and its Supporting Information files.*
- If neither of these applies but you are able to provide **details of access elsewhere**, with or without limitations, please do so. For example:

*Data cannot be shared publicly because of [XXX]. Data are available from the XXX Institutional Data Access / Ethics Committee (contact via XXX) for researchers who meet the criteria for access to confidential data.*

*The data underlying the results presented in the study are available from (include the name of the third party*

Publicly available datasets were analyzed in this study. This data can be found here:

<https://data.mendeley.com/datasets/9xxm58dvs3/2>

The results presented in this paper can be reproduced through the source codes found here:

[https://github.com/MuhammadAsimButt/sicap\\_multi\\_label](https://github.com/MuhammadAsimButt/sicap_multi_label)

*and contact information or URL).*

- This text is appropriate if the data are owned by a third party and authors do not have permission to share the data.

\* typeset

Additional data availability information:

# Using Multi-Label Ensemble CNN Classifiers to Mitigate Labelling Inconsistencies in Patch-level Gleason Grading

Muhammad Asim Butt<sup>1</sup>, Muhammad Farhat Kaleem<sup>2</sup>, Muhammad Bilal<sup>3,\*</sup> and Muhammad Shehzad Hanif<sup>4</sup>

<sup>1</sup> Department of Electrical Engineering, University of Management and Technology, Lahore 54782, Pakistan; [asim.butt@umt.edu.pk](mailto:asim.butt@umt.edu.pk)

<sup>2</sup> School of Engineering, University of Management and Technology, Lahore 54782, Pakistan; [farhat.kaleem@umt.edu.pk](mailto:farhat.kaleem@umt.edu.pk)

<sup>3</sup> Center of Excellence in Intelligent Engineering Systems, King Abdulaziz University, Jeddah 21589, Saudi Arabia; [meftekar@kau.edu.sa](mailto:meftekar@kau.edu.sa)

<sup>4</sup> Department of Electrical and Computer Engineering, King Abdulaziz University, Jeddah 21589, Saudi Arabia; [mshanif@kau.edu.sa](mailto:mshanif@kau.edu.sa)

\* Corresponding author

**Abstract:** This paper presents a novel approach to enhance the accuracy of patch-level Gleason grading in prostate histopathology images, a critical task in the diagnosis and prognosis of prostate cancer. This study shows that the Gleason grading accuracy can be improved by addressing the prevalent issue of label inconsistencies in the SI-CAPv2 prostate dataset, which employs a majority voting scheme for patch-level labels. We propose a multi-label ensemble deep-learning classifier that effectively mitigates these inconsistencies and yields more accurate results than the state-of-the-art works. Specifically, our approach leverages the strengths of three different one-vs-all deep learning models in an ensemble to learn diverse features from the histopathology images to individually indicate the presence of one or more Gleason grades (G3, G4, and G5) in each patch. These deep learning models have been trained using transfer learning to fine-tune a variant of the ResNet18 CNN classifier chosen after an extensive ablation study. Experimental results demonstrate that our multi-label ensemble classifier significantly outperforms traditional single-label classifiers reported in the literature by at least 14% and 4% on accuracy and f1-score metrics respectively. These results underscore the potential of our proposed machine learning approach to improve the accuracy and consistency of prostate cancer grading.

**Keywords:** Machine Learning; Image Recognition; Multi-Label Classification; Convolutional Neural Networks; Gleason Grading.



## 1. Introduction

Prostate cancer is one of the most common types of cancer in men, posing significant challenges in diagnosis and treatment. Traditional diagnostic methods, such as biopsy followed by histopathological examination, are invasive and subject to inter-observer variability. With the advent of digital pathology, the potential for computer-aided diagnosis has opened up, promising more accurate and consistent results. In this regard, various researchers have considered Deep learning, a subset of machine learning, which has shown remarkable success in image recognition tasks, making it a promising tool for digital pathology as well. In recent years, there has been a surge of research exploring the application of deep learning methodologies to digital pathology in prostate cancer. These studies have spanned a range of tasks, from pre-processing tasks like quality assessment and staining normalization, to diagnostic tasks like cancer detection and Gleason grading, and even prediction tasks such as recurrence prediction or genomic correlations [1]. The research in this area has been fueled by the fact that conventional image recognition tasks and the analysis of whole slide images (WSIs) in digital pathology share several similarities, which make deep learning techniques highly applicable and beneficial for both. Moreover, transfer learning, a powerful technique in deep learning, where a model trained on one task is repurposed on a related task has been instrumental in this field since in digital pathology, annotated data can be scarce [2]. Thus, various well-known neural network architectures pre-trained for general purpose image recognition tasks have been readily adapted by the researchers for digital pathology domain. Network fine-tuning as well as using activations from inner layers as features have been tried. Thus, by leveraging pre-trained models, researchers can overcome the challenge of limited annotated data in the field of digital pathology and improve the performance of deep learning models in detecting and classifying prostate cancer from WSIs. However, as suggested by Rabilloud et al. [3], there is still room for improvement and more work is needed to validate these models externally and ensure their robustness in real-world clinical settings. It is particularly important to note here that while there are similarities with the general-purpose imagery, there are also unique challenges in digital pathology, such as the need for extremely high-resolution image analysis, that require specialized adaptations of these techniques.

A critical component of prostate cancer diagnosis and prognosis is 'Gleason Grading', a system used to evaluate the stage of prostate cancer using prostate biopsy samples. However, it presents several challenges. There is often

57 considerable inter-observer variability even among expert pathologists, which could lead to unnecessary treatment  
58 or missing a severe diagnosis. This makes the task of Gleason grading difficult and subjective due to the need for  
59 visual assessment of cell differentiation and Gleason pattern predominance. In a bid to come up with a robust  
60 automated method for Gleason scoring through deep learning, researchers have commonly employed patch-based  
61 detection. This method involves dividing the whole slide images (WSIs) into smaller, manageable 'patches' of im-  
62 ages, which are then analyzed individually [4, 5]. An initial study by Speier et al. [5] proposed an automatic patch  
63 selection process based on image features. This algorithm segments the biopsy and aligns patches based on the  
64 tissue contour to maximize the amount of contextual information in each patch. The patches are then used to train  
65 a fully convolutional network (machine learning model) to segment high grade, low grade, and benign tissue from  
66 a set of histopathological slides. Another similar study used a convolutional neural network (CNN) for automated  
67 detection of Gleason patterns and determination of the grade groups [6]. The outcome of the CNN was subse-  
68 quently converted into probability maps, and the grade group of the whole biopsy was obtained according to these  
69 probability maps. Another notable recent effort is the introduction of SICAPv2 dataset [7] consisting of 155 biopsies  
70 (WSIs) from 95 different patients. The dataset has pixel-level Gleason Grading (GG) labeled through consensus of  
71 expert pathologists. The authors claimed unprecedented detection accuracy using a custom CNN architecture to  
72 classify the GG labels at the patch level. However, as noted earlier, the labelling of WSIs being a tedious task, this  
73 dataset also suffers from inexact and incomplete pixel-level labelling [8]. Specifically, the patch-level labelling has  
74 been done through majority vote of how each pixel in the patch is labeled according to the Gleason grade. This  
75 approach, however, leads to at least three problems i.e.

76 **Loss of Information:** The majority voting scheme potentially ignores the information related to the minority clas-  
77 ses which are inevitably present in numerous patches

78 **Misclassification:** If the patch contains a mix of different Gleason grades, the majority voting scheme could result  
79 in misclassification since it is highly sensitive to the manual pixel-level labelling done by the pathologists

80 **Labelling Noise:** The presence of label noise can negatively affect the training performance of the machine learning  
81 models which rely heavily on the accuracy of the provided labels

83 To this end, the work described in this paper,

- 84 • Provides a statistical analysis of the patch-level labelling noise in SICAPv2 prostate histology dataset.
- 85 • Proposes an ensemble machine learning classifier to detect all occurrences (multi-labels) of Gleason grades  
86 at the patch level, rather than just the majority grade.
- 87 • Provides an open-source framework for Gleason grading at patch and WSI-level based on the proposed  
88 ensemble classifier to facilitate researchers and practitioners working in the field of digital histopathology.

## 89 **2. Background**

90 As noted earlier, various researchers have considered using machine learning approaches, especially deep learn-  
91 ing, to advance the field of digital pathology in the sub-domain of prostate cancer detection and grading [9-12].  
92 Abut et al. [13] have explored how the medical field is experiencing a data explosion, particularly with images and  
93 other unstructured data which presents both opportunities and challenges for classifying and segmenting these  
94 data sources. Traditional statistical methods combined with image processing techniques have been used to solve  
95 medical problems. However, the increasing size and resolution of data have led to advancements in artificial in-  
96 telligence, especially deep learning techniques, for evaluating these data to identify, classify, and quantify patterns  
97 for clinical needs. Ruiz-Fresneda et al. [14] have provided a study which examines worldwide scientific output on  
98 the application of machine learning to the most significant types of cancer, using a range of bibliometric measures.  
99 On similar lines, Morozov et al. [15] have provided a comprehensive review of the precision of various Artificial  
100 Intelligence (AI) techniques in diagnosing and grading prostate cancer based on histological analysis. Their con-  
101 clusion was that the precision of AI in identifying and grading Prostate Cancer (PCa) matches that of skilled  
102 pathologists. This promising method has numerous potential clinical uses, leading to faster and more efficient  
103 pathology reports. However, they also cautioned that the implementation of AI in routine practice may be hin-  
104 dered by the complex and time-consuming process of training and fine-tuning convolutional neural networks.  
105 Akinuwesi et al. [16] have explored the utility of a conventional machine learning algorithm i.e. Support Vector  
106 Machine (SVM) on a small dataset [17]. They have reported 98.6% accuracy for the binary classification task. Other  
107 researchers such as Li et al. [18] have considered deep learning approaches in prostate cancer diagnosis using

108 Magnetic Resonance Imaging (MRI). However, while MRI is more accurate than WSI testing, it still faces several  
109 challenges such as increased cost, lack of broad availability, differences in MRI acquisition and interpretation pro-  
110 tocols. Moreover, WSI is particularly useful for Gleason grading and has been considered widely by the research-  
111 ers. For instance, Mandal et al. [19] have investigated transfer learning for adapting well-known CNN architectures  
112 to the task of cancer detection. However, WSIs require careful processing as noted by Kanwal et al. [20] and Foucart  
113 et al. [21]. Another recent study has developed a deep learning model that uses gigapixel pathology images and  
114 slide-level labels for prostate cancer detection and Gleason grading [22]. The model first crops whole-slide images  
115 into small patches and extracts features from these patches using a deep learning model trained with self-super-  
116 vised learning. Tabatabaei et al. [23, 24] have considered the problem of making manual annotation less laborious  
117 through automated retrieval of similar cancerous patches using a CNN-based autoencoder. Recently, Morales-  
118 Álvarez et al. [25] have proposed the use of multiple instance learning to tackle the problem of patch-level label  
119 generation by exploiting the correlation among neighboring patches. Although 95.11% accuracy has been reported  
120 on SICAPv2 dataset, this study is limited to the binary cancer detection task and Gleason grading has not been  
121 considered. In a similar approach proposed by Schmidt et al. [26], a multi-class grading with an F1-score of 0.72  
122 has been reported. However, both works do not reproduce the detailed results on the four validation and one test  
123 sets of SICAPv2 dataset. The latter work has also reported an F1-score of 0.81 on the PANDA dataset which is  
124 another comprehensive collection of prostate cancer biopsies used for the **Prostate cANcer graDe Assessment**  
125 (PANDA) Challenge [27]. This dataset consists of almost 11,000 biopsies available as whole-slide images of hema-  
126 toxylin and eosin (H&E) stained tissue specimens. Similar to SICAPv2, the grading process for this dataset also  
127 involves finding and classifying cancer tissue into Gleason patterns (3, 4, or 5) based on the architectural growth  
128 patterns of the tumor.

129 Pati et al. [28] have considered both segmentation of the WSIs as well as the classification at the patch-level on  
130 three different datasets including SICAP. However, their reported F1 score on the latter is merely 0.65 which is  
131 lower than the previously reported results in the literature. Golfe et al. [29, 30] have taken another innovative  
132 approach to improve the Gleason grading in the wake of insufficient, imbalanced and poorly labelled training  
133 examples. Specifically, they have trained a generative network to artificially create more training examples than

134 are available in the original SICAP dataset. The main idea is to enhance the classification accuracy through more  
135 variations in the training data. They have reported an average accuracy and F1-score of 0.71 and 0.67 respectively  
136 which is a marginal improvement over the work of Silva-Rodríguez et al. [7].

137 Ambrosini et al. [31] have trained a custom CNN for the detection of cribriform pattern which is a specific arrange-  
138 ment of cells that is seen in WSIs for some types of cancer, including prostate cancer. It is characterized by small,  
139 round or oval glands that are arranged in a sieve-like pattern. The cribriform pattern is thought to be associated  
140 with more aggressive cancers, and it may be a factor in determining a patient's prognosis. They have reported a  
141 mean area under the curve of up to 0.81 in sensitivity vs false positives graph. In comparison, Silva-Rodríguez et  
142 al. [7] have also considered detection of cribriform pattern with a score of 0.82. However, the comparison is incon-  
143 clusive since very different datasets have been employed by these two studies.

144 This brief overview of recent studies on machine learning methods for detecting and classifying prostate cancer  
145 from WSIs clearly indicates that there is significant scope for enhancement, particularly in dealing with the issue  
146 of noisy labels at the patch level.

### 147 **3. Materials and Methods**

148 This section describes our approach to accurately assign Gleason grades to the patches extracted from WSIs for  
149 prostate cancer using a multi-label approach. Our methodology leverages the power of CNNs and the concept of  
150 transfer learning for recognizing intricate imaging patterns for classification. Specifically, we utilize pre-trained  
151 CNN architectures as the backbone of our model, capitalizing on their proven ability to extract robust features  
152 from image data. The models are trained and validated using the SICAPv2 dataset, a comprehensive collection of  
153 prostate histopathology images with annotated Gleason grades. This approach allows us to harness the existing  
154 knowledge encapsulated in these architectures and adapt it to the specific task of Gleason grade detection. More-  
155 over, the multi-label approach enables the model to predict multiple Gleason grades that may be present in a single  
156 image, thereby providing a more nuanced understanding of the disease's severity. Specific details of the proposed  
157 detection framework have been given in the following sub-sections. The effectiveness of the proposed approach

158 has been validated by comparing it with state-of-the-art results reported in the literature using various metrics, as  
159 detailed in Section 4.

### 160 **3.1. Dataset Overview**

161 The focus of this research is the SICAPv2 dataset, comprising 155 biopsies from 95 individual patients. WSIs have  
162 been obtained from tissue samples by slicing, staining and ultimately digitizing. Skilled urogenital pathologists  
163 reviewed these slides and assigned a unified Gleason score to each biopsy. The distribution of primary Gleason  
164 grades (GG) in the biopsies is as follows: 36 noncancerous regions, 40 samples with Gleason grade 3 (GG3), 64 with  
165 Gleason grade 4 (GG4), and 15 with Gleason grade 5 (GG5). To handle the large WSIs, they were downsampled to  
166 10x resolution and segmented into 512x512 patches with a 50% overlap. A tissue presence mask for the patches  
167 was generated using the Otsu threshold method. Patches with less than 20% tissue were excluded for model de-  
168 velopment aimed at predicting the main Gleason grade. The database comprises 4417 non-cancerous patches, 1635  
169 labelled as GG3, 3622 as GG4, and 665 as GG5. It's important to note that in cases where a patch contained multiple  
170 annotated grades, the label of the predominant grade was assigned. Additionally, 763 GG4 patches also contain  
171 annotated cribriform glandular regions. To facilitate model training and optimize the involved hyperparameters,  
172 the dataset has been partitioned by the original authors using a cross-validation approach. Specifically, each pa-  
173 tient was exclusively allocated to one-fold to prevent overestimation of system performance and ensure its gener-  
174 alization. As such, the database was split into 5 groups (i.e. Val1, Val2, Val3, Val4 and Test), each containing  
175 roughly 20% of the patches. It's important to highlight that this division aimed to maintain class balance across  
176 sets.

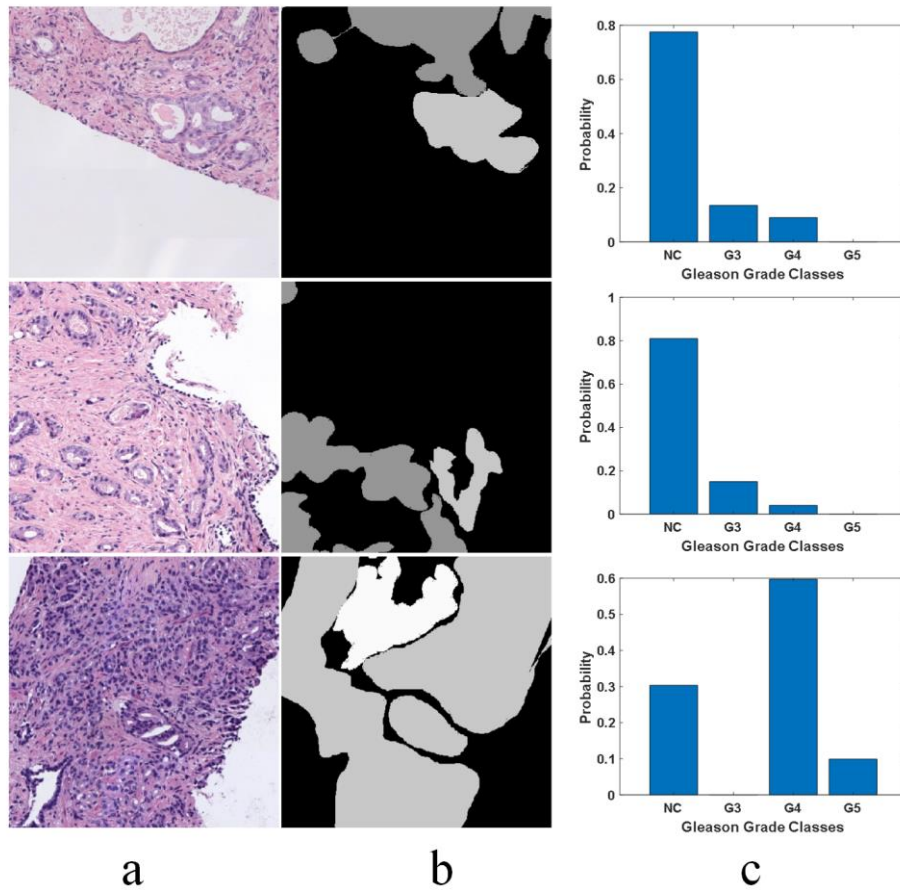

**Figure 1. Examples of misclassified pixels due to majority voting-based labelling in SICAPv2 dataset. The pixels belonging to the minority class don't get acknowledged separately (a) RGB Patch; (b) Labelling Mask; (c) Probability distribution estimate of the grades/classes represented in the Mask**

### 3.2. Patch-level Labelling Inconsistencies

As previously outlined, Gleason grading for prostate cancer involves two distinct labelling approaches at the patch-level and whole slide image (WSI) level, each with its own set of benefits and challenges. The patch-level labelling method assigns labels to individual "patches" within a WSI, allowing for a detailed tissue analysis. This is particularly beneficial when a single WSI contains multiple Gleason grades. However, this method requires significant time and expertise for manual annotation of each patch. As mentioned before, SICAPv2 has provided patch-level labels to facilitate classification. This scheme requires that if a patch contains more than one annotated grade, the label typically assigned is the majority grade. This practice can lead to several issues. For instance, it may result in information loss about other grades present within the same patch, potentially oversimplifying the tissue's complexity and heterogeneity. Additionally, the majority grade may not accurately represent the entire

191 patch's characteristics. For example, a patch might contain a substantial amount of a higher Gleason grade, but if  
192 it's not the majority, it could be overlooked, potentially underestimating the disease's severity. There can also be  
193 variability in the assignment of the majority grade among different observers, leading to label inconsistencies. This  
194 is especially true in cases where the distribution of different grades within a patch is nearly equal. Lastly, a model  
195 trained on such data might not perform well in real-world scenarios where multiple Gleason grades are present in  
196 a single patch. Thus, a patch might contain a substantial amount of a higher Gleason grade, but if it's not the  
197 majority, it could be overlooked, potentially underestimating the disease's severity. To address these issues, this  
198 work has proposed multi-label classification which allows each patch to be assigned multiple labels corresponding  
199 to the different Gleason grades present, accurately capturing the tissue's complexity and heterogeneity.

200 To appreciate the level of label inconsistencies in SICAPv2 dataset, several statistics have been collected in this  
201 study. Figure 1 shows three example patches where pixels depict a variety of different grades (mask manually  
202 annotated by expert histopathologists) while the label has been assigned based on simple majority vote. Thus, a  
203 significant number of pixels in a patch could be misclassified due to a higher level of granularity. Figure 2 provides  
204 a statistical insight into the label inconsistency problem by showing probability distributions of misclassified pixel  
205 belonging to different grades/classes in the patches belonging to SICAPv2 dataset partition 'Val1'. It can be ob-  
206 served that upto 30% of pixels could be mislabeled if they don't belong to the majority class.

207 The misclassification statistics for SICAPv2 dataset have been summarized in Table 1. It can be noticed that while  
208 on average only up to 2% of pixels are misclassified in a given set, as many as 30% could be misclassified in indi-  
209 vidual instances. This misclassification can potentially lead to suboptimal performance while training a machine  
210 learning classifier especially in the wake of high level of imbalance. In the light of these observations, this study  
211 suggests implementing a multi-label strategy where each patch could carry multiple labels. The assignment of  
212 these labels depends on whether the proportion of pixels that fall into a particular category exceeds a specified  
213 threshold.

214

215



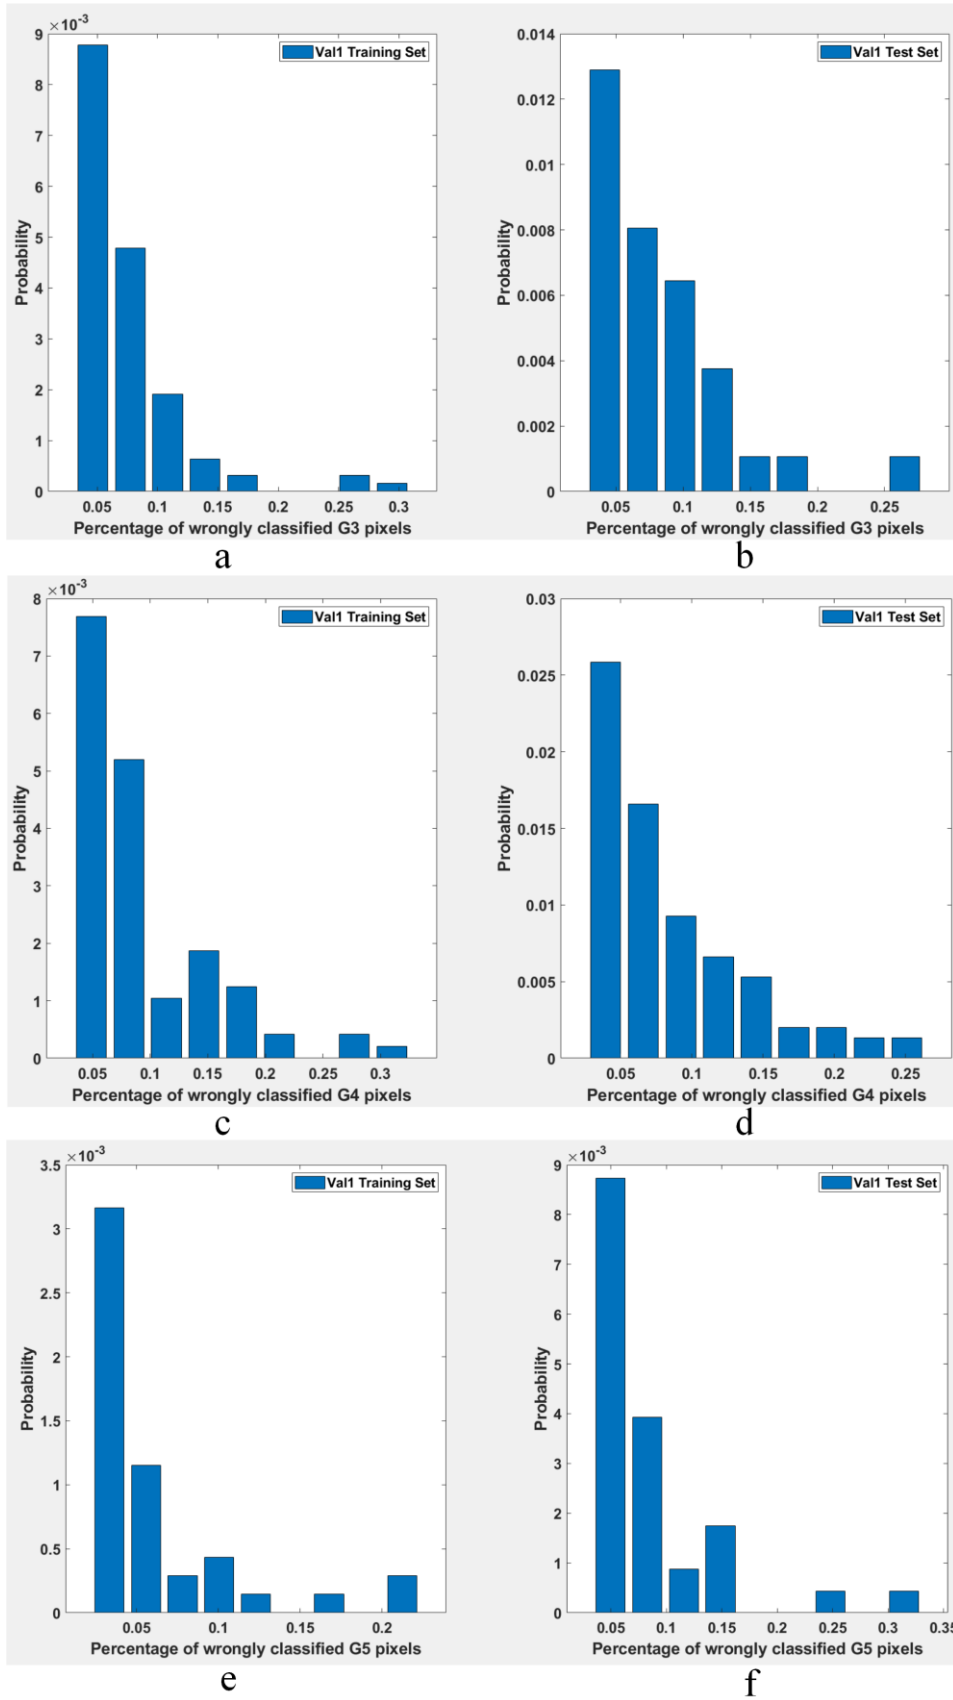

Figure 2. Probability distributions of misclassified pixel belonging to different classes in SICAPv2 dataset partition 'Val1' (a) G3 training; (b) G3 test; (c) G4 test; (d) G4 test; (e) G5 test; (f) G5 test

216

217

218

**Table 1. Summarized statistics related to misclassification of different classes in SICAPv2 dataset partitions**

|                 | Class | Average area of misclassified pixels | Maximum area of misclassified pixels |
|-----------------|-------|--------------------------------------|--------------------------------------|
| Val1<br>(Train) | G3    | 1.7%                                 | 30%                                  |
|                 | G4    | 1.8%                                 | 30%                                  |
|                 | G5    | 1.1%                                 | 22%                                  |
| Val1<br>(Test)  | G3    | 1.6%                                 | 27%                                  |
|                 | G4    | 1.8%                                 | 25%                                  |
|                 | G5    | 1.8%                                 | 30%                                  |
| Val2<br>(Train) | G3    | 1.7%                                 | 30%                                  |
|                 | G4    | 1.9%                                 | 30%                                  |
|                 | G5    | 1.7%                                 | 30%                                  |
| Val2<br>(Test)  | G3    | 1.3%                                 | 25%                                  |
|                 | G4    | 1.4%                                 | 25%                                  |
|                 | G5    | 0.3%                                 | 7%                                   |
| Val3<br>(Train) | G3    | 1.5%                                 | 25%                                  |
|                 | G4    | 1.6%                                 | 25%                                  |
|                 | G5    | 1.7%                                 | 30%                                  |
| Val3<br>(Test)  | G3    | 1.7%                                 | 30%                                  |
|                 | G4    | 1.9%                                 | 30%                                  |
|                 | G5    | 1.2%                                 | 22%                                  |
| Test<br>(Train) | G3    | 1.7%                                 | 30%                                  |
|                 | G4    | 1.9%                                 | 30%                                  |
|                 | G5    | 1.7%                                 | 30%                                  |
| Test<br>(Test)  | G3    | 1.1%                                 | 18%                                  |
|                 | G4    | 1.0%                                 | 17%                                  |
|                 | G5    | 0.5%                                 | 10%                                  |

220

### 221 3.3. Methods

222 In this study, we propose an ensemble classifier to generate a multi-label hypothesis for every individual test input  
223 patch. The proposed ensemble classifier, shown in Figure 3, itself consists of individual CNN-based one-vs-all  
224 classifiers to hypothesize the presence or absence of each corresponding class i.e. Gleason Grade 3, 4 or 5. The  
225 rationalization behind the conception of this ensemble classifier is two-fold. First, each one-vs-all CNN classifier  
226 is deemed to perform better since all the layers (initial as well as final) will be devoted to feature extraction and

227 classification specifically for each class. In contrast, a single multi-class CNN classifier shares the features extrac-  
228 tion (initial layers) for all classes and only the head is devoted individually to each class. Second, multi-label ap-  
229 proach to mitigate the labelling inconsistency problem can be efficiently handled by one-vs-all ensemble classifier  
230 especially since the number of classes are few and each classifier could be individually fine-tuned to address a  
231 single label.

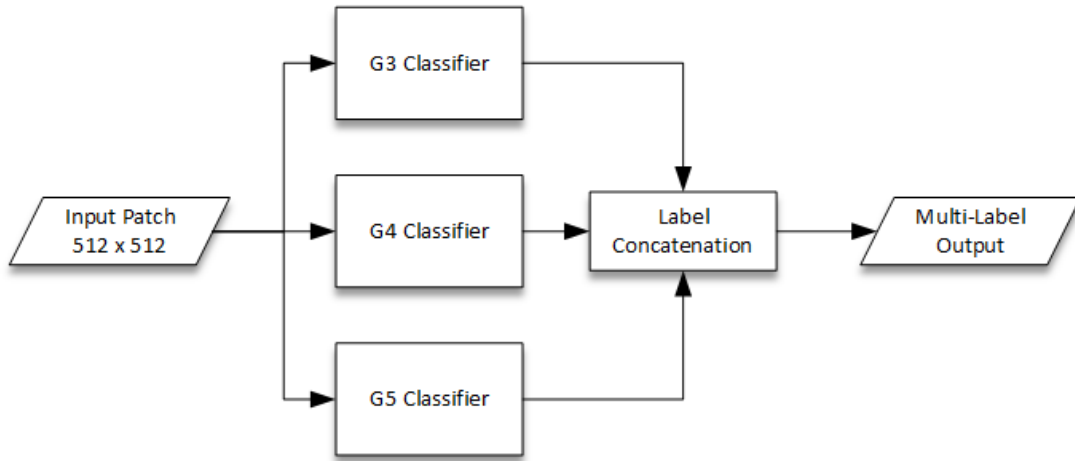

232  
233 **Figure 3. Proposed ensemble classifier with individual CNN-based one-vs-all binary classifiers**

234 The input to the ensemble classifier is a  $512 \times 512$  image patch to be consistent with the default size of SICAPv2  
235 dataset patches. Each individual classifier is a CNN dedicatedly trained for each of the three Gleason Grades i.e.  
236 G3, G4 and G5. These classifiers detect the corresponding class against the default Non-Cancerous (NC) class and  
237 all other grades (one-vs-all classifiers). The multi-label hypothesis is a concatenation of the respective outputs from  
238 each classifier. Due to the relatively small size of the dataset, a transfer learning approach is proposed to prevent  
239 overfitting and training difficulties. For this purpose, different well-known CNN architectures such as ResNet18,  
240 ResNet50 and Inception etc. [32] pre-trained on ImageNet dataset [33] and their derivatives have been considered  
241 in the ablation study to select the best performing network.

242 The training and testing procedure of the proposed multi-label ensemble classifier has been depicted in Figure 4.  
243 Since the original dataset comes only with patch-level labels decided based on the majority votes, the first step is  
244 to generate multi-labels for each patch using the provided labelling masks. The label for each class (G3, G4 and  
245 G5) would be included in the output multi-label if the pixels corresponding to that class are above a certain per-  
246 centage threshold. NC label is issued only if none of the pixels belonging to G3, G4 or G5 are present. Appropriate

247 threshold values for training and testing respectively have been found using the ablation study described in the  
248 next section. The split between training and test sub-groups is based on the guidelines of the original dataset. The  
249 ensemble model is then trained by individually training the three component CNN one-vs-all models for each  
250 class i.e. G3, G4 and G5. The proposed multi-label ensemble classifier is then tested on the test examples for detec-  
251 tion performance using standard metrics (e.g. accuracy and F1-Score etc.) as detailed in the next section.

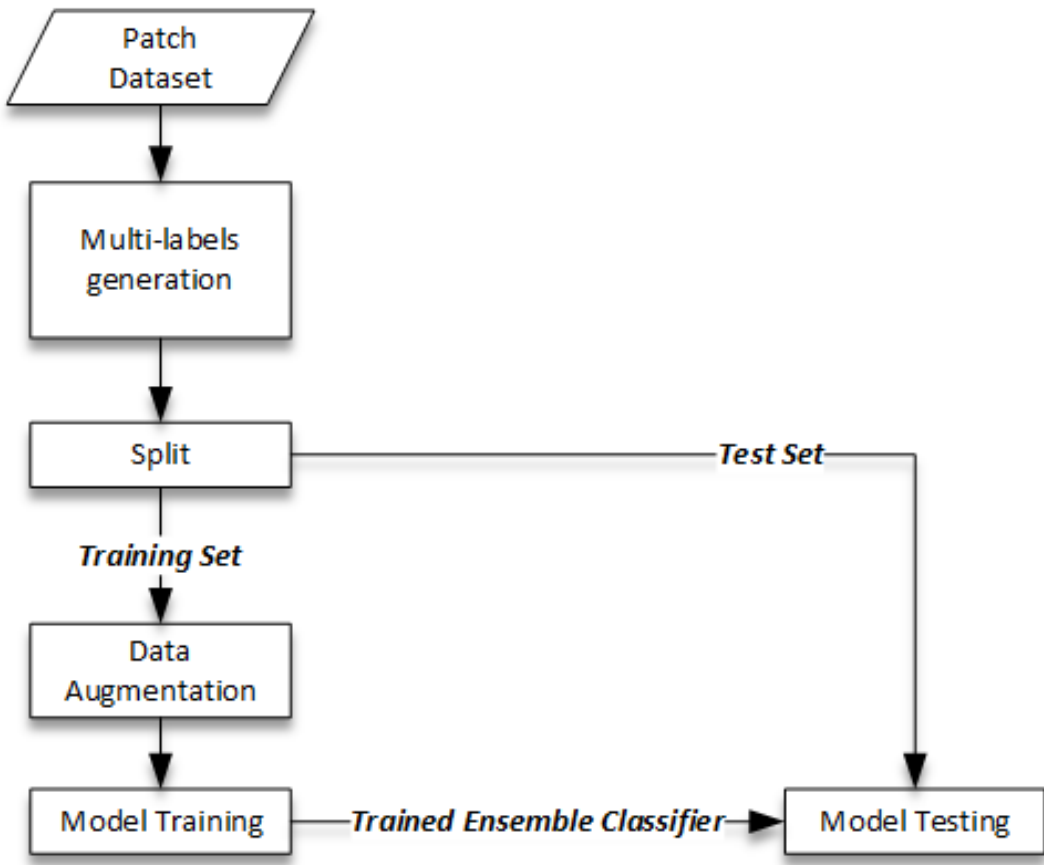

252  
253 **Figure 4. Training and testing paradigm for the proposed multi-label ensemble classifiers**

254 A critical consideration while training the one-vs-all ensemble classifiers for multi-label scenario is the high data  
255 imbalance since the "all" category inevitably has many more training examples than the "one" category, leading to  
256 a bias towards the majority class. A potential solution to this problem is the use of a weighted cross-entropy loss  
257 function while training the models and has been adopted by Silva-Rodríguez et al. [7] even for their multi-class  
258 model since SICAPv2 is inherently an imbalanced dataset. Specifically, this function assigns more weight to under-

259 represented classes and less weight to over-represented classes, penalizing the model more for misclassifying mi-  
260 nority classes. However, setting these weights requires careful consideration to avoid overfitting to the minority  
261 class. In this work, we have used ablation experiments to empirically determine the optimal weights.

262 The whole training and testing framework for the proposed ensemble classifier has been implemented in Matlab  
263 environment (R2022b) using Deep Learning Toolbox [32]. The computing environment is Intel(R) Core(TM) i9-  
264 9900K CPU @ 3.60GHz with 64 GB RAM and NVIDIA GeForce RTX 2080 Ti GPU.

## 265 **4. Results**

266 This section presents the findings of our comprehensive study using the proposed ensemble classifier consisting  
267 of individual one-vs-all sub-classifiers for Gleason grade scoring task using multi-label approach. The following  
268 sub-section describes the ablation study conducted for a detailed analysis of the impact of various hyperparame-  
269 ters on the performance of the classifier. The patch-level Gleason grading results given later in this section demon-  
270 strate the effectiveness of our proposed method in classifying individual patches of histopathological images. Fi-  
271 nally, the WSI-level labelling results illustrate the classifier's ability to accurately label entire histopathological  
272 slides. These results collectively highlight the robustness and efficacy of our proposed ensemble classifier in  
273 Gleason grade scoring.

### 274 **4.1 Ablation Study**

275 This sub-section presents the results of the ablation study conducted to tune various hyperparameters for the pro-  
276 posed ensemble classifier. These hyperparameters include the CNN architectures of the one-vs-all sub-classifiers,  
277 the threshold for assigning multi-labels at the patch level based on the pixel percentage belonging to a particular  
278 class, the number of epochs for training the model, the learning rate, and the L2 regularization factor. By system-  
279 atically varying these hyperparameters, the influence of each on the model's performance has been studied and  
280 used to identify the final configuration suitable for the Gleason grade scoring task practically. For this purpose,  
281 the validation sets i.e. Val1, Val2, Val3 and Val4 of SICAPv2 datasets have been employed in all the experimenta-  
282 tions.

283  
284  
285  
286  
287  
288  
289  
290  
291  
292  
293  
294

While selecting the appropriate CNN architecture for each of the one-vs-all sub-classifiers to be used in the ensemble for each class, we have considered well-known CNNs e.g. ResNet18, ResNet50 and Inception pre-trained on ImageNet for transfer learning because these have learned robust feature representations, which can be leveraged to achieve high performance on our specific task with less data and training time. However, we observed a common trend of overfitting across these networks. Overfitting is a modeling error that occurs when a function is too closely fit to a limited set of data points and may therefore fail to predict additional data or future observations reliably. Figure 5 depicts one such scenario where we used ResNet18 as the sub-classifier for G3 grade on training set of 'Val1'. It can be seen that as the training progressed, the divergence between the training loss and validation loss increases which is a classic sign of overfitting. This problem can be mitigated through techniques such as using a lower complexity model, L2 regularization, early stopping, and data augmentation. To this end, we have employed standard image data augmentation techniques (resizing, rotation, translation and flipping) and early stopping if the validation loss increases for 8 consecutive epochs.

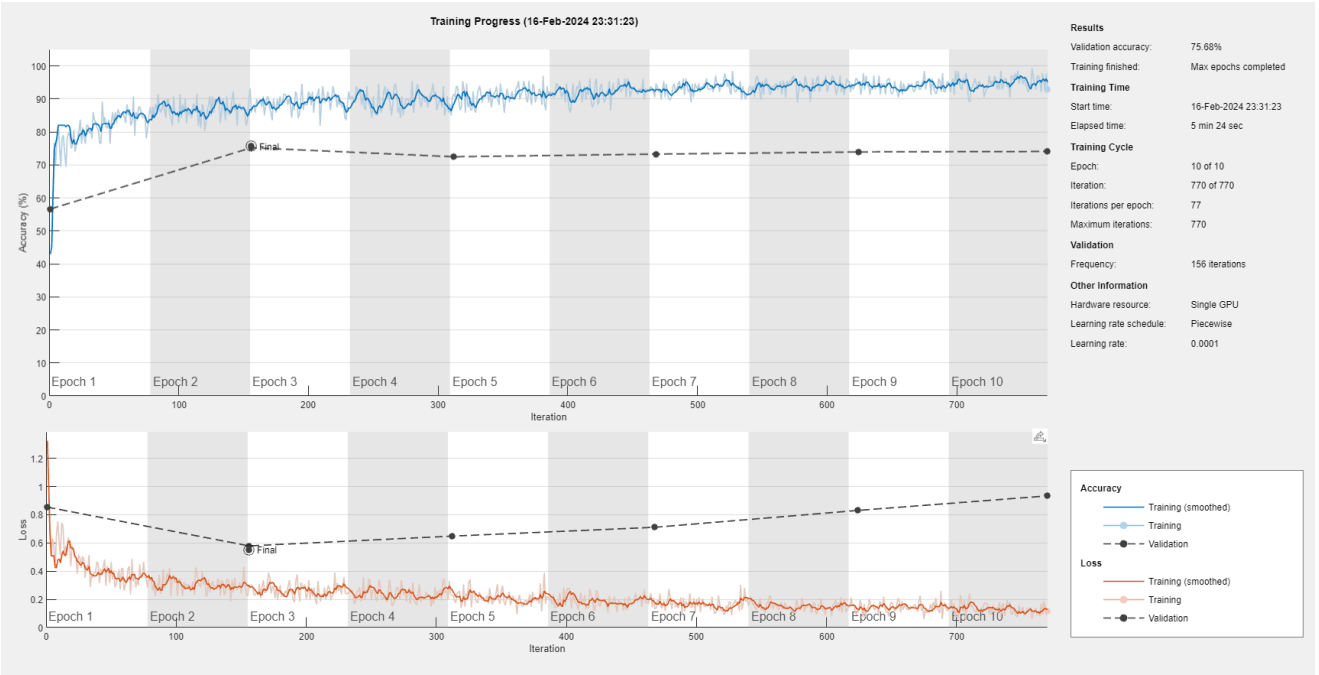

295  
296  
297  
298  
299

**Figure 5. Overfitting observed with ResNet18 CNN as sub-classifier for G3 grade classification in 'Val1' training set**

Additionally, given that even ResNet18 despite being the least complex among all considered CNNs led to overfitting, we have attempted to simplify it further. This was done by eliminating some of its final layers, thereby

reducing its complexity and potentially making it less susceptible to overfitting. Specifically, the `conv5` layer group and half of the `conv4` layer group (i.e., `4b`) of the standard ResNet18 architecture have been eliminated. This effectively reduced the model's complexity, making it less prone to overfitting. Thus, the final Global Average Pooling (GAP) layer has been directly connected to the output of `res4a\_relu`. Finally, a fully connected and SoftMax layer for classification have been placed at the end of the proposed architecture. The architectural details of this proposed architecture have been given in Table 2. In addition to the aforementioned modifications, it's important to note that our initial attempts at mitigating overfitting by only removing the `conv5` layer from ResNet18 were not successful. The model continued to overfit despite this simplification. On the other hand, when we further removed the `res4a` layer, we observed a drop in the accuracy i.e. underfitting. Thus, the present architecture has been selected to strike a balance.

**Table 2. Architecture of the proposed CNN model for binary classification (one-vs-all)**

| Layer Name                                  | Activation Size            |
|---------------------------------------------|----------------------------|
| Image Input                                 | $224 \times 224 \times 3$  |
| Conv1 (7 × 7, 64) Stride 2, BN, Relu, MAP-2 | $112 \times 112 \times 64$ |
| Conv2a (3 × 3, 64) Stride 1, BN, Relu       | $56 \times 56 \times 64$   |
| Conv2b (3 × 3, 64) Stride 1, BN, Relu       | $56 \times 56 \times 64$   |
| Conv3a (3 × 3, 128) Stride 2, BN, Relu      | $28 \times 28 \times 128$  |
| Conv3b (3 × 3, 128) Stride 1, BN, Relu      | $28 \times 28 \times 128$  |
| Conv4a (3 × 3, 256) Stride 1, Relu, GAP     | $1 \times 1 \times 256$    |
| Fully Connected, SoftMax                    | 2                          |

While training the proposed CNN architectures for each sub-class (G3, G4 and G5), a learning rate of '1e-3' was selected. This value was found to be optimal as higher learning rates led to suboptimal results, while lower rates required a greater number of epochs to converge. The learning rate has been scheduled to drop by 0.1 every 15th epoch. Moreover, the learning rate of the final fully connected layer is set to be '10' times higher than that of the initial layers, adhering to the practice of transfer learning. This approach ensures that the initial layers, which have been pre-trained on the ImageNet dataset, largely retain their learned weights. Meanwhile, the final layer can quickly adapt to the examples from the Sicapv2 dataset. Although convergence has been observed to be generally

318 achieved after '15' epochs in all the conducted experiments, the training is extended to '50' epochs for extra meas-  
 319 ure. This additional training helps to fine-tune the model as the initial layers also gradually adopt to the dataset  
 320 and potentially improve its ability to generalize from the training data to unseen data. Adam optimizer has been  
 321 used throughout all the experiments as the initial experiments with SGDM did not yield promising results.

**Table 3. Effect of L2 Regularization parameter on F1-score (Validation Set)**

| Value  | F1-Score |
|--------|----------|
| 1e-3   | 0.68     |
| 9e-3   | 0.69     |
| 9.5e-3 | 0.71     |
| 1e-2   | 0.71     |
| 1.2e-2 | 0.71     |
| 2e-2   | 0.68     |
| 1e-1   | 0.6      |

323  
 324 Since, overfitting is a serious concern in Sicapv2 dataset owing to its smaller size, in order to identify the most  
 325 effective L2 regularization parameter, the study involved a series of experiments on the four validation sets (Val1,  
 326 Val2, Val3 and Val4), systematically varying the L2 regularization parameter to evaluate its impact on the model's  
 327 performance. The results have been given in Table 3. For sake of brevity, only the experimental values around '1e-  
 328 2' have been reported which was found to be the optimal value yielding the highest F1 score of '0.71'. Figure 6  
 329 depicts an example training loss curve after optimizing the hyperparameters mentioned above. It can be noticed  
 330 that the overfitting has been managed effectively.

331 Finally, to assign multiple labels to each patch based on the percentage of pixels belonging to each class i.e. G3, G4  
 332 and G5, our experimental results have shown that the presence of even 1% pixels belonging to a particular class is  
 333 enough for training and classification. For a patch size of  $512 \times 512$ , this corresponds to at least 2621 pixels. Using  
 334 a higher threshold leads to elimination of too many training examples which leads to overfitting especially for G5  
 335 class which has too few example patches. On the other hand, a lower threshold means too few representative pixels  
 336 in a given patch for extracting meaningful features.



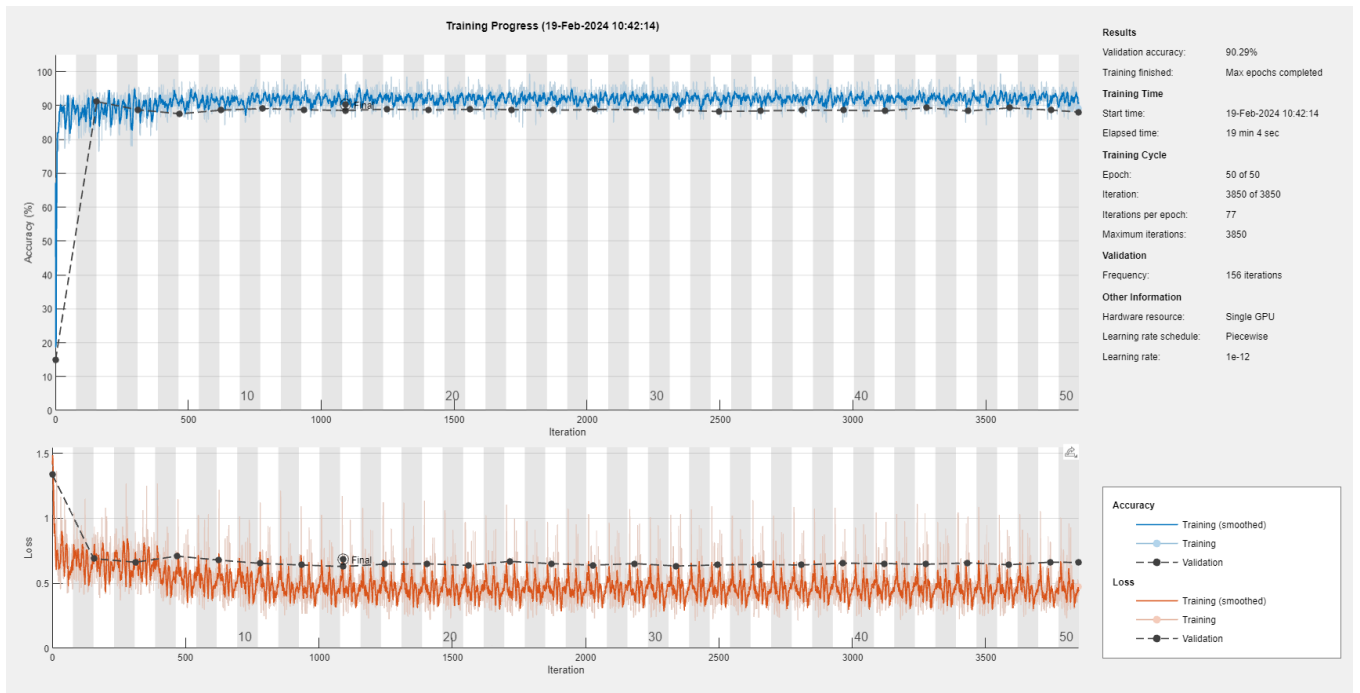

**Figure 6. Training loss curves for the proposed CNN architecture as sub-classifier for G3 grade classification in 'Val1' training set after hyperparameter optimization**

The proposed ensemble classifier has been trained and tested on the SICAPv2 dataset using the obtained hyperparameters. The results have been reported in the next sub-section.

#### 4.2 Patch-Level Gleason Grading Results

The proposed ensemble classifier has been compared against the state-of-the-art works in Table 4. Every constituent one-vs-all sub-classifier is based on the CNN architecture depicted in Table 2 and has been trained four times for each of the validation and test sets of SICAPv2 datasets to ensure consistency of the results. Standard deviation of less than 0.05 has been observed in all the experiments which indicates high repeatability of the proposed approach. Accuracy and F1-scores have been reported in each case. Due to the imbalanced nature of the dataset, a higher F1-score is more important and indicative of a more robust model. It can be observed that the proposed

352  
353  
354  
355  
356

model achieves higher accuracy as well as F1-score (average of all classes) than the recent works reported in the literature on both validation and test sets of SICAPv2 dataset.

Precision-recall curves for the individual sub-classifiers on validation and test sets have been plotted in Figures 7-11. F1-score has been overlaid as well. The values reported in Table 4 correspond to the best value obtained for each curve.

**Table 4. Comparison of the proposed ensemble classifier against reference works**

| Model                        | Accuracy | F1-Score |      |      |      |      |
|------------------------------|----------|----------|------|------|------|------|
|                              |          | Average  | NC   | G3   | G4   | G5   |
| <b>Test Set</b>              |          |          |      |      |      |      |
| Ensemble Classifier Proposed | 0.85     | 0.71     | 0.85 | 0.69 | 0.75 | 0.54 |
| FSConv [7]                   | 0.67     | 0.65     | 0.86 | 0.59 | 0.54 | 0.61 |
| ProGleason-GAN [29]          | 0.71     | 0.67     | -    | -    | -    | -    |
| WHOLELIGHT [28]              | -        | 0.66     | -    | -    | -    | -    |
| <b>Validation Set</b>        |          |          |      |      |      |      |
| Proposed Ensemble            | 0.87     | 0.75     | 0.83 | 0.72 | 0.77 | 0.69 |
| FSConv [7]                   | 0.76     | 0.71     | 0.88 | 0.73 | 0.71 | 0.54 |

357

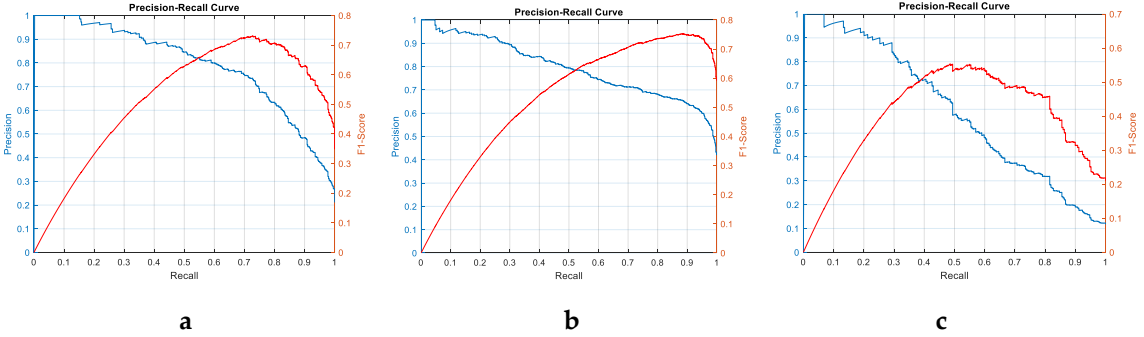

358  
359  
360  
361  
362

**Figure 7. Precision-Recall and F1-Score curves for the sub-classifiers in the ensemble detector on SICAPv2 'test' set (a) G3 (b) G4 (c) G5**

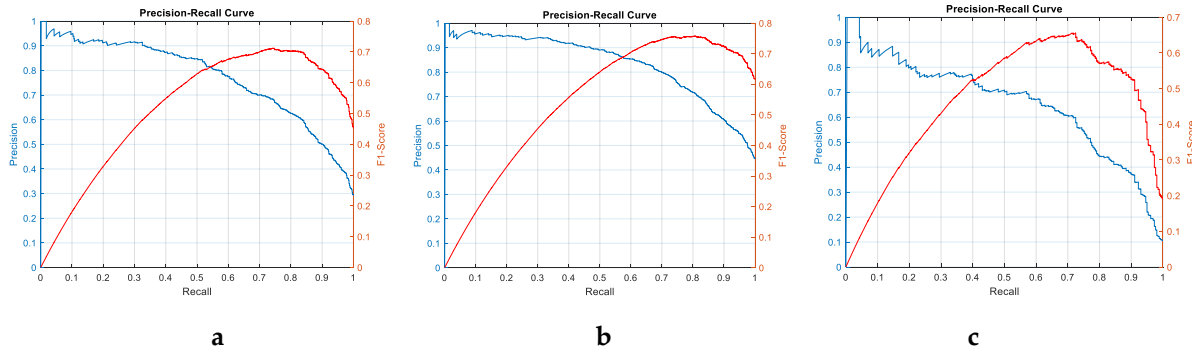

363  
364  
365  
366

**Figure 8. Precision-Recall and F1-Score curves for the sub-classifiers in the ensemble detector on SICAPv2 'val1' set (a) G3 (b) G4 (c) G5**

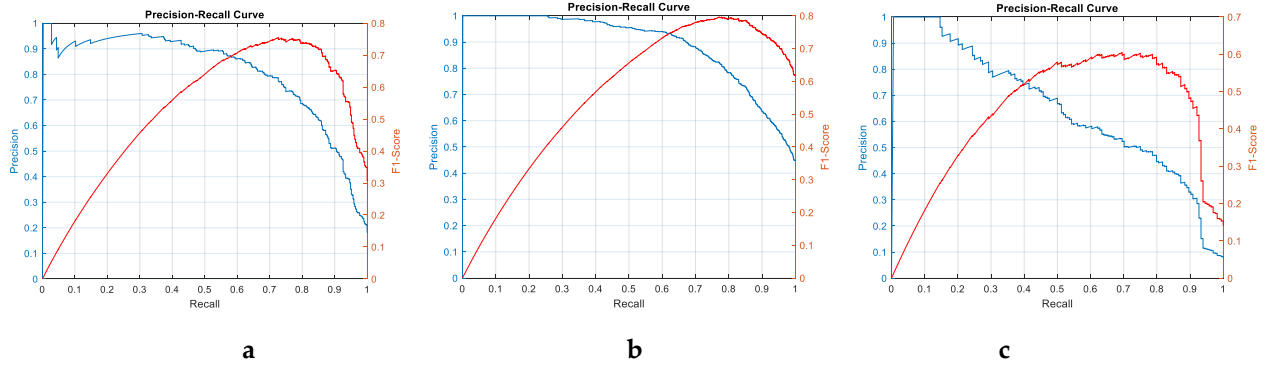

367  
 368  
 369 **Figure 9. Precision-Recall and F1-Score curves for the sub-classifiers in the ensemble detector on SICAPv2**  
 370 **'val2' set (a) G3 (b) G4 (c) G5**

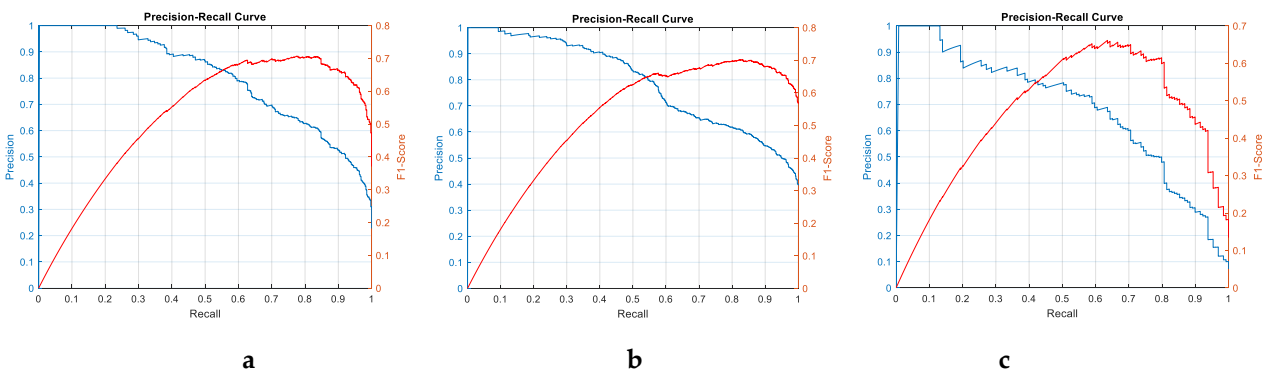

372  
 373  
 374 **Figure 10. Precision-Recall and F1-Score curves for the sub-classifiers in the ensemble detector on SICAPv2**  
 375 **'val3' set (a) G3 (b) G4 (c) G5**

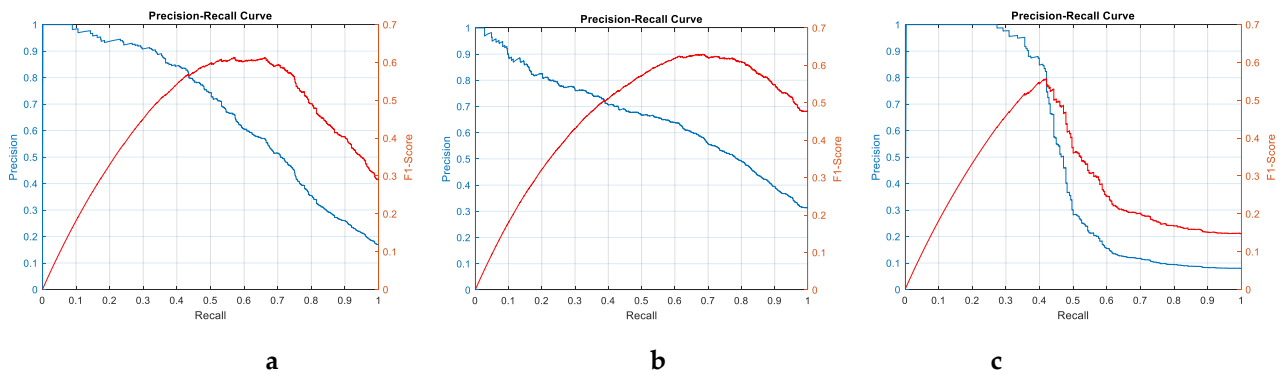

376  
 377  
 378  
 379 **Figure 11. Precision-Recall and F1-Score curves for the sub-classifiers in the ensemble detector on SICAPv2**  
 380 **'val4' set (a) G3 (b) G4 (c) G5**

381  
 382 To gain further insight into the decision-making process of the trained CNN models, Figure 12, Figure 13 and  
 383 Figure 14 depict 'Grad-CAM' [34] visualization of the three sub-classifiers on three different examples. Grad-CAM  
 384 provides a visual explanation of the decision-making process of a CNN, which is crucial in medical imaging. Spe-  
 385 cifically, it generates a heatmap that highlights the significant regions in the input image that the CNN focuses on

386  
387  
388

when making a prediction. This allows medical professionals to understand why a particular diagnosis was made. Figure 12 shows an example patch containing only G5, labelled orange in the mask. The corresponding heat map for the G5 sub-classifier roughly corresponds to the labelled mask emphasizing the confidence in its utility.

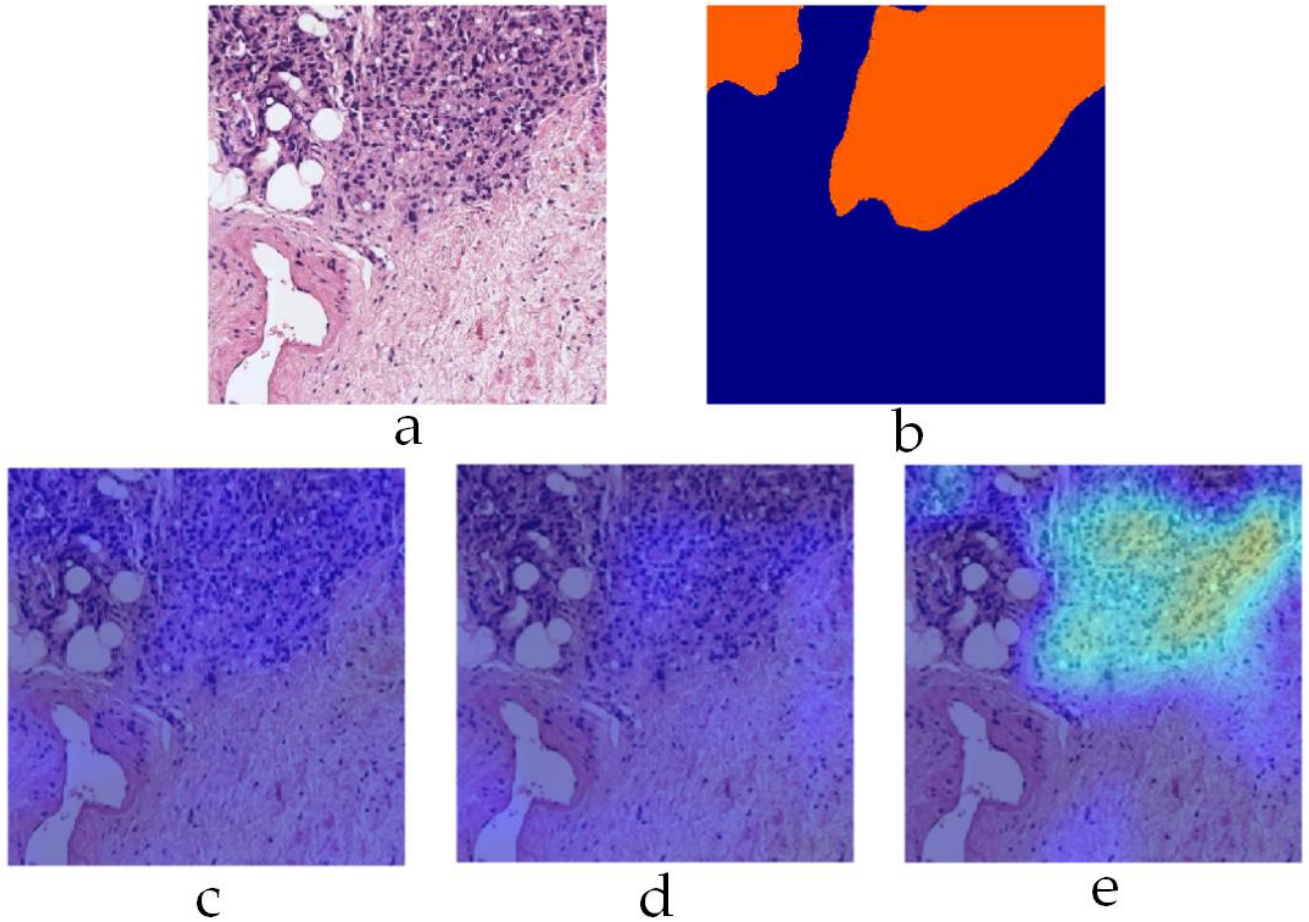

389  
390  
391  
392

**Figure 12. Grad-CAM visualization on example 1 a) input patch b) label mask c) G3 sub-classifier heat map d) G4 sub-classifier heat map e) G5 sub-classifier heat map**

393  
394  
395  
396  
397  
398

The example shown in Figure 13 contains both G4 and G5 categories (Cyan and Orange labels) and have been rightly classified by their corresponding sub-classifiers as indicated by their respective heatmaps. The heatmap for G5, however, significantly overlaps that of G4 indicating the similarities between these two classes. Figure 14 shows another interesting example containing only G3 class (labelled yellow). The labelling area only makes up a small portion of the whole mask towards the bottom. Despite this, the corresponding heatmap for only G3 classifier shows a strong activation map.

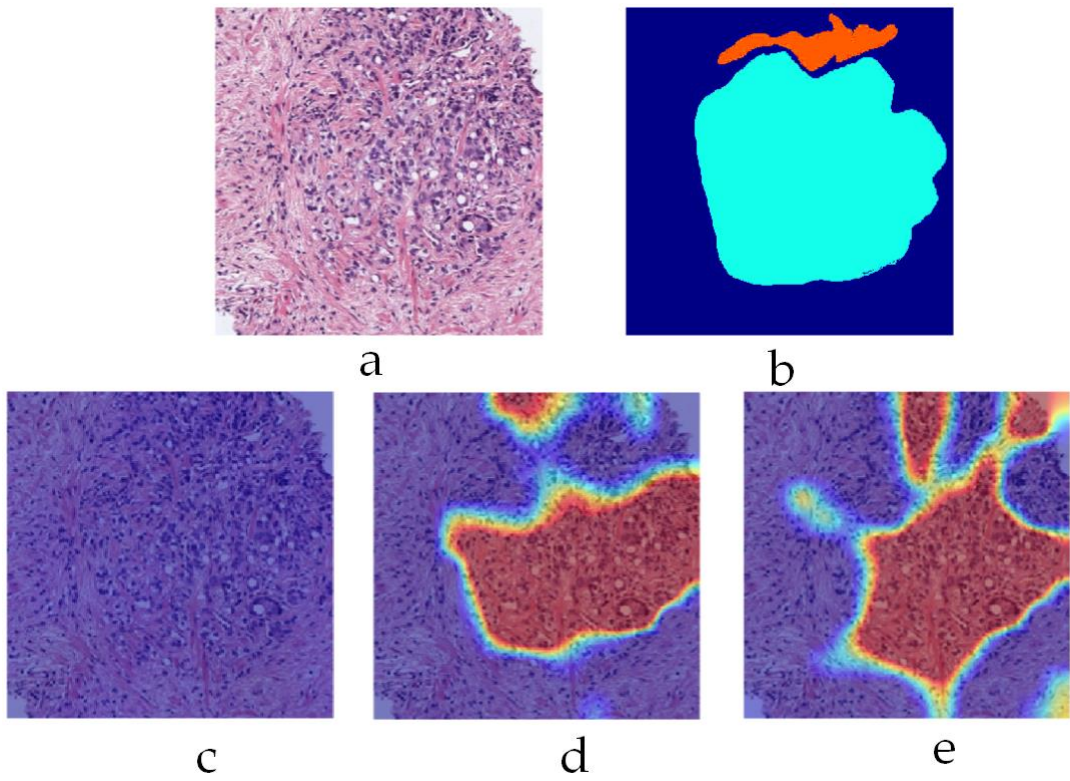

399  
 400 **Figure 13. Grad-CAM visualization on example 2 a) input patch b) label mask c) G3 sub-classifier heat map d)**  
 401 **G4 sub-classifier heat map e) G5 sub-classifier heat map**  
 402

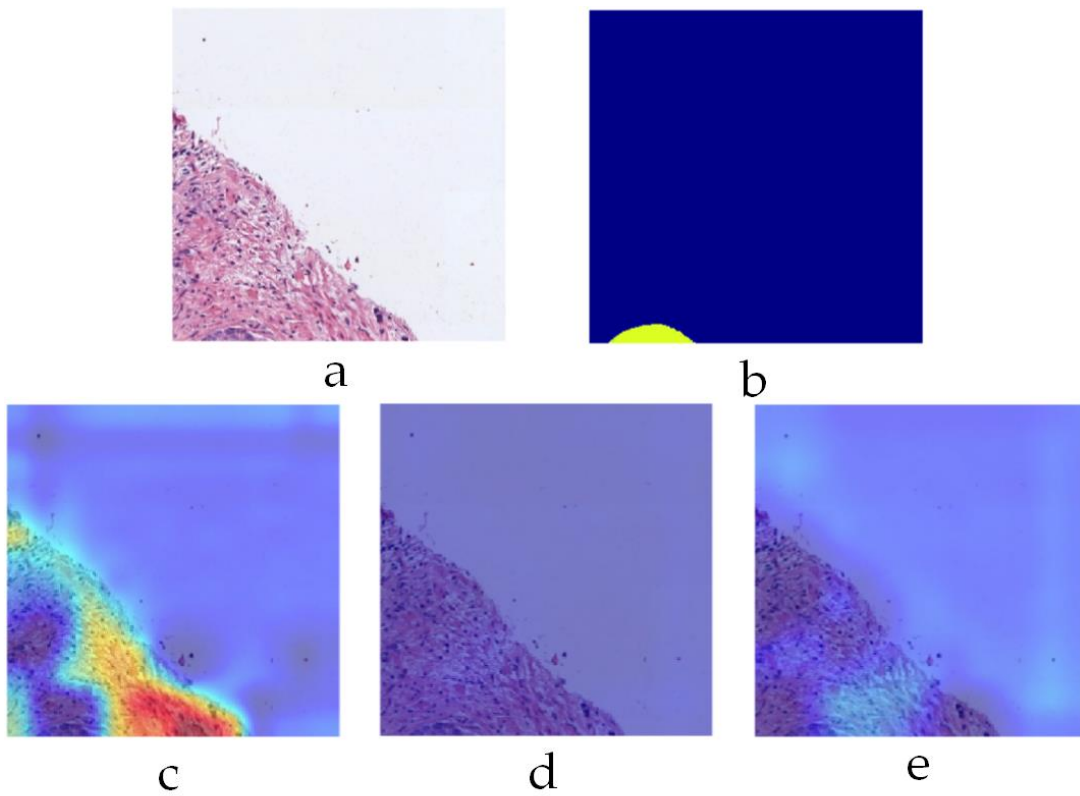

403  
 404 **Figure 14. Grad-CAM visualization on example 3 a) input patch b) label mask c) G3 sub-classifier heat map d)**  
 405 **G4 sub-classifier heat map e) G5 sub-classifier heat map**



406  
407

Figure 15 shows the corresponding activation maps for the proposed classifier on a whole biopsy slide with Gleason grades labelled G4 and G5 as primary and secondary respectively.

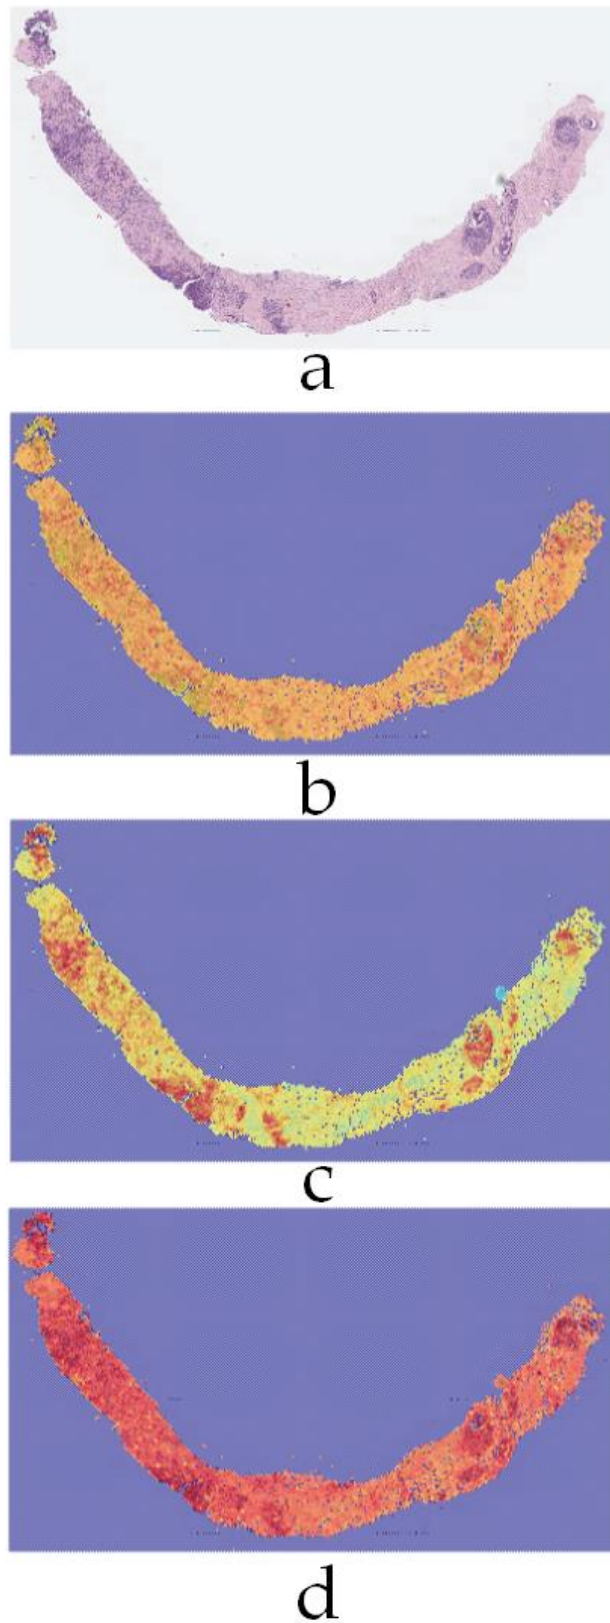

408  
409

Figure 15. Activation maps on a WSI example a) Input image b) G3 c) G4 d) G5

## 5. Discussion

The proposed multi-label classification approach for Gleason grading of prostate cancer at the patch-level by employing an ensemble of sub-classifiers to individually detect each of the three Gleason grades (G3, G4, and G5) represents a departure from traditional multi-class classification techniques. The results presented in the previous section demonstrate the effectiveness of our proposed method since it achieved a significant improvement over the state-of-the-art work on both test and validation sets of SICAPv2 dataset. Specifically, our model outperformed by achieving 14% higher accuracy and a 4% higher F1-score on the test set (Table 4). Given the imbalance in the dataset, the F1-score becomes a more significant metric than accuracy. Our proposed classifier demonstrated superior performance on the G3 and G4 classes, achieving a higher F1-score compared to competing models. More importantly, despite the individual class performance, our model maintained a higher average F1-score. This indicates that our model is not only effective at identifying specific Gleason grades but also maintains a balanced performance across all classes, which is crucial in the context of imbalanced datasets. This further underscores the robustness and reliability of our proposed multi-label classification approach for Gleason grading in prostate cancer detection.

The lower F1-score for the G5 class on the test set can indeed be attributed to the significant class imbalance, with only 250 examples for G5 compared to 1873 for the remaining classes. This imbalance can skew the performance metrics and make it challenging to achieve high scores for underrepresented classes. However, it's encouraging to see that the performance on the validation set is better, with only the G3 classifier slightly underperforming. Moreover, despite these individual class performances, the average F1-score of our model is superior on both sets. This demonstrates the robustness of our proposed multi-label classification approach, even in the face of significant class imbalances.

Incorporating the important observation of pixels belonging to multiple classes being present in each patch, our study's results demonstrate the superiority of the multi-label approach over conventional multi-class classification for Gleason grade classification at the patch level. This is particularly evident in certain patches where pixels belonging to more than one class can be present, making the classification of a patch to just a single Gleason score inappropriate. Despite the class imbalance, our multi-label approach achieved a higher average F1-score on both

436 the test and validation sets, indicating effective identification of each Gleason grade independently. The multi-  
437 label approach proved more robust to class imbalance, achieving a higher average F1-score even with fewer ex-  
438 amples of the G5 class. This robustness is crucial in medical imaging, where certain conditions may be underrepre-  
439 sented. The multi-label approach also allows for more fine-grained classification, treating each Gleason grade as a  
440 separate label, enabling more nuanced predictions beneficial at the patch level where subtle differences can be  
441 crucial for accurate diagnosis. The improved F1-scores for the G3 and G4 classes on the validation set further  
442 underscore the effectiveness of the multi-label approach. These results suggest that the multi-label approach pro-  
443 vides a more accurate and robust method for Gleason grade classification at the patch level, making it a promising  
444 technique for improving the accuracy and reliability of prostate cancer detection.

## 445 **6. Conclusions**

446 This study has proposed a multi-label ensemble deep-learning classifier to increase the accuracy of Gleason grad-  
447 ing by effectively addressing the issue of label inconsistencies inherently present in the dataset patches. The pro-  
448 posed ensemble classifier consists of three one-vs-all sub-classifiers, fine-tuned variants of the ResNet18 CNN ar-  
449 chitecture, to accurately indicate the presence of one or more Gleason grades (G3, G4, and G5) in each patch. The  
450 experimental results demonstrate the superiority of our approach over traditional single-label classifiers, thereby  
451 enhancing the accuracy and consistency of Gleason grading. One potential improvement for the future tasks is  
452 deemed to be the segmentation of the labeling masks at pixel-level granularity, which could increase the accuracy  
453 of patch-level Gleason scoring. Additionally, the labeling noise due to manual annotation could be mitigated by  
454 generating labeling masks through the trained model and then re-verifying them through human experts. These  
455 enhancements could further improve the precision of Gleason grading and contribute to the ongoing efforts to  
456 leverage advanced machine learning techniques in cancer diagnostics. The proposed framework has been made  
457 available as open-source code to facilitate researchers and practitioners working in the field of digital histopathol-  
458 ogy.

459

460



## 461 **Author Contributions:**

462 “Conceptualization, M.A., M.B. and M.F.K; methodology, M.A.; software, M.A.; validation, M.A., M.S.H and M.B.;  
463 formal analysis, M.A.; investigation, M.A.; resources, M.S.H and M.B.; data curation, M.A.; writing—original draft  
464 preparation, M.A.; writing—review and editing, M.A., M.B. and M.F.K; visualization, M.A.; supervision, M.B. and  
465 M.F.K; project administration, M.B.; funding acquisition, M.S.H and M.B. All authors have read and agreed to the  
466 published version of the manuscript.”

## 467 **Data Availability Statement:**

468 Publicly available datasets were analyzed in this study. This data can be found here: [https://data.mende-](https://data.mendeley.com/datasets/9xxm58dvs3/2)  
469 [ley.com/datasets/9xxm58dvs3/2](https://data.mendeley.com/datasets/9xxm58dvs3/2)

470 The results presented in this paper can be reproduced through the source codes found here:

471 [https://github.com/MuhammadAsimButt/sicap\\_multi\\_label](https://github.com/MuhammadAsimButt/sicap_multi_label)

## 472 **Acknowledgment:**

473 This research work was funded by Institutional Fund Projects under grant no. (IFPIP: 1825-135-1443). The authors  
474 gratefully acknowledge technical and financial support provided by the Ministry of Education and King Abdulaziz  
475 University, DSR, Jeddah, Saudi Arabia.

## 476 **References:**

- 477 [1] S. Deng *et al.*, "Deep learning in digital pathology image analysis: a survey," *Frontiers of Medicine*, vol. 14, no.  
478 4, pp. 470-487, 2020/08/01 2020.
- 479 [2] R. Mormont, P. Geurts, and R. Marée, "Comparison of Deep Transfer Learning Strategies for Digital  
480 Pathology," in *2018 IEEE/CVF Conference on Computer Vision and Pattern Recognition Workshops (CVPRW)*, 2018, pp.  
481 2343-234309.
- 482 [3] N. Rabilloud *et al.*, "Deep Learning Methodologies Applied to Digital Pathology in Prostate Cancer: A  
483 Systematic Review," *Diagnostics*, vol. 13, no. 16. doi: 10.3390/diagnostics13162676

- 484 [4] D. Karimi, G. Nir, L. Fazli, P. C. Black, L. Goldenberg, and S. E. Salcudean, "Deep Learning-Based Gleason  
485 Grading of Prostate Cancer From Histopathology Images—Role of Multiscale Decision Aggregation and Data  
486 Augmentation," *IEEE Journal of Biomedical and Health Informatics*, vol. 24, no. 5, pp. 1413-1426, 2020.
- 487 [5] S. William, L. Jiayun, L. Wenyuan, S. Karthik, and A. Corey, "Image-based patch selection for deep learning  
488 to improve automated Gleason grading in histopathological slides," *bioRxiv*, p. 2020.09.26.314989, 2020.
- 489 [6] M. Lucas *et al.*, "Deep learning for automatic Gleason pattern classification for grade group determination  
490 of prostate biopsies," *Virchows Archiv*, vol. 475, no. 1, pp. 77-83, 2019/07/01 2019.
- 491 [7] J. Silva-Rodríguez, A. Colomer, M. Sales, R. Molina, and V. Naranjo, "Going Deeper through the Gleason  
492 Scoring Scale: An Automatic end-to-end System for Histology Prostate Grading and Cribriform Pattern Detection,"  
493 *Computer Methods and Programs in Biomedicine*, vol. 195, p. 105637, 2020.
- 494 [8] V. Anklin *et al.*, "Learning Whole-Slide Segmentation from Inexact and Incomplete Labels Using Tissue  
495 Graphs," in *Medical Image Computing and Computer Assisted Intervention – MICCAI 2021*, Cham, 2021, pp. 636-646:  
496 Springer International Publishing.
- 497 [9] X. Meng and T. Zou, "Clinical applications of graph neural networks in computational histopathology: A  
498 review," *Computers in Biology and Medicine*, vol. 164, p. 107201, 2023/09/01/ 2023.
- 499 [10] M. Cooper, Z. Ji, and R. G. Krishnan, "Machine learning in computational histopathology: Challenges and  
500 opportunities," *Genes, Chromosomes and Cancer*, vol. 62, no. 9, pp. 540-556, 2023/09/01 2023.
- 501 [11] R. S. George *et al.*, "Artificial intelligence in prostate cancer: Definitions, current research, and future  
502 directions," *Urologic Oncology: Seminars and Original Investigations*, vol. 40, no. 6, pp. 262-270, 2022/06/01/ 2022.
- 503 [12] M. S. Hosseini *et al.*, "Computational Pathology: A Survey Review and The Way Forward," *Journal of*  
504 *Pathology Informatics*, p. 100357, 2024/01/14/ 2024.
- 505 [13] S. Abut, H. Okut, and K. J. Kallail, "Paradigm shift from Artificial Neural Networks (ANNs) to deep  
506 Convolutional Neural Networks (DCNNs) in the field of medical image processing," *Expert Systems with*  
507 *Applications*, vol. 244, p. 122983, 2024/06/15/ 2024.

- 508 [14] M. A. Ruiz-Fresneda, A. Gijón, and P. Morales-Álvarez, "Bibliometric analysis of the global scientific  
509 production on machine learning applied to different cancer types," *Environmental Science and Pollution Research*,  
510 vol. 30, no. 42, pp. 96125-96137, 2023/09/01 2023.
- 511 [15] A. Morozov *et al.*, "A systematic review and meta-analysis of artificial intelligence diagnostic accuracy in  
512 prostate cancer histology identification and grading," (in eng), *Prostate Cancer Prostatic Dis*, vol. 26, no. 4, pp. 681-  
513 692, Dec 2023.
- 514 [16] B. A. Akinnuwesi *et al.*, "Application of support vector machine algorithm for early differential diagnosis of  
515 prostate cancer," *Data Science and Management*, vol. 6, no. 1, pp. 1-12, 2023/03/01/ 2023.
- 516 [17] J. L. Mohler *et al.*, "Prostate Cancer, Version 1.2016," (in English), *Journal of the National Comprehensive Cancer  
517 Network J Natl Compr Canc Netw*, vol. 14, no. 1, pp. 19-30, 01 Jan. 2016 2016.
- 518 [18] D. Li *et al.*, "Deep Learning in Prostate Cancer Diagnosis Using Multiparametric Magnetic Resonance  
519 Imaging With Whole-Mount Histopathology Referenced Delineations," (in English), *Original Research* vol. 8, 2022-  
520 January-13 2022.
- 521 [19] S. Mandal, D. Roy, and S. Das, "Prostate Cancer: Cancer Detection and Classification Using Deep Learning,"  
522 in *Advanced Machine Learning Approaches in Cancer Prognosis: Challenges and Applications*, J. Nayak, M. N.  
523 Favorskaya, S. Jain, B. Naik, and M. Mishra, Eds. Cham: Springer International Publishing, 2021, pp. 375-394.
- 524 [20] N. Kanwal, F. Pérez-Bueno, A. Schmidt, K. Engan, and R. Molina, "The Devil is in the Details: Whole Slide  
525 Image Acquisition and Processing for Artifacts Detection, Color Variation, and Data Augmentation: A Review,"  
526 *IEEE Access*, vol. 10, pp. 58821-58844, 2022.
- 527 [21] A. Foucart, A. Elskens, O. Debeir, and C. Decaestecker, "Finding the best channel for tissue segmentation in  
528 whole-slide images," in *2023 19th International Symposium on Medical Information Processing and Analysis (SIPAIM)*,  
529 2023, pp. 1-4.
- 530 [22] M. Liang, C. Hao, and G. Ming, "Prostate cancer grade using self-supervised learning and novel feature  
531 aggregator based on weakly-labeled gbit-pixel pathology images," *Applied Intelligence*, vol. 54, no. 1, pp. 871-885,  
532 2024/01/01 2024.

- 533 [23] Z. Tabatabaei, A. Colomer, J. O. Moll, and V. Naranjo, "Toward More Transparent and Accurate Cancer  
534 Diagnosis With an Unsupervised CAE Approach," *IEEE Access*, vol. 11, pp. 143387-143401, 2023.
- 535 [24] Z. Tabatabaei, A. Colomer, K. Engan, J. Oliver, and V. Naranjo, "Self-supervised learning of a tailored  
536 Convolutional Auto Encoder for histopathological prostate grading," in *2023 31st European Signal Processing  
537 Conference (EUSIPCO)*, 2023, pp. 980-984.
- 538 [25] P. Morales-Álvarez, A. Schmidt, J. M. Hernández-Lobato, and R. Molina, "Introducing instance label  
539 correlation in multiple instance learning. Application to cancer detection on histopathological images," *Pattern  
540 Recognition*, vol. 146, p. 110057, 2024/02/01/ 2024.
- 541 [26] A. Schmidt, J. Silva-Rodríguez, R. Molina, and V. Naranjo, "Efficient Cancer Classification by Coupling Semi  
542 Supervised and Multiple Instance Learning," *IEEE Access*, vol. 10, pp. 9763-9773, 2022.
- 543 [27] W. Bulten *et al.*, "Artificial intelligence for diagnosis and Gleason grading of prostate cancer: the PANDA  
544 challenge," *Nature Medicine*, vol. 28, no. 1, pp. 154-163, 2022/01/01 2022.
- 545 [28] P. Pati *et al.*, "Weakly supervised joint whole-slide segmentation and classification in prostate cancer,"  
546 *Medical Image Analysis*, vol. 89, p. 102915, 2023/10/01/ 2023.
- 547 [29] A. Golfe, R. del Amor, A. Colomer, M. A. Sales, L. Terradez, and V. Naranjo, "ProGleason-GAN: Conditional  
548 progressive growing GAN for prostatic cancer Gleason grade patch synthesis," *Computer Methods and Programs in  
549 Biomedicine*, vol. 240, p. 107695, 2023/10/01/ 2023.
- 550 [30] A. Golfe, R. d. Amor, A. Colomer, M. A. Sales, L. Terradez, and V. Naranjo, "Towards the On-Demand  
551 Whole Slide Image Generation: Prostate Patch Synthesis Through a Conditional Progressive Growing GAN," in  
552 *2023 31st European Signal Processing Conference (EUSIPCO)*, 2023, pp. 1070-1074.
- 553 [31] P. Ambrosini, E. Hollemans, C. F. Kweldam, G. J. L. H. v. Leenders, S. Stallinga, and F. Vos, "Automated  
554 detection of cribriform growth patterns in prostate histology images," *Scientific Reports*, vol. 10, no. 1, p. 14904,  
555 2020/09/10 2020.
- 556 [32] Mathworks. (2024, 14th Feb). *Built-In Pretrained Networks*. Available:  
557 <https://www.mathworks.com/help/deeplearning/built-in-pretrained-networks.html>

558  
559  
560  
561  
562  
563

[33] O. Russakovsky *et al.*, "ImageNet Large Scale Visual Recognition Challenge," *International Journal of Computer Vision*, vol. 115, no. 3, pp. 211-252, 2015/12/01 2015.

[34] R. R. Selvaraju, M. Cogswell, A. Das, R. Vedantam, D. Parikh, and D. Batra, "Grad-CAM: Visual Explanations from Deep Networks via Gradient-Based Localization," *International Journal of Computer Vision*, vol. 128, no. 2, pp. 336-359, 2020/02/01 2020.

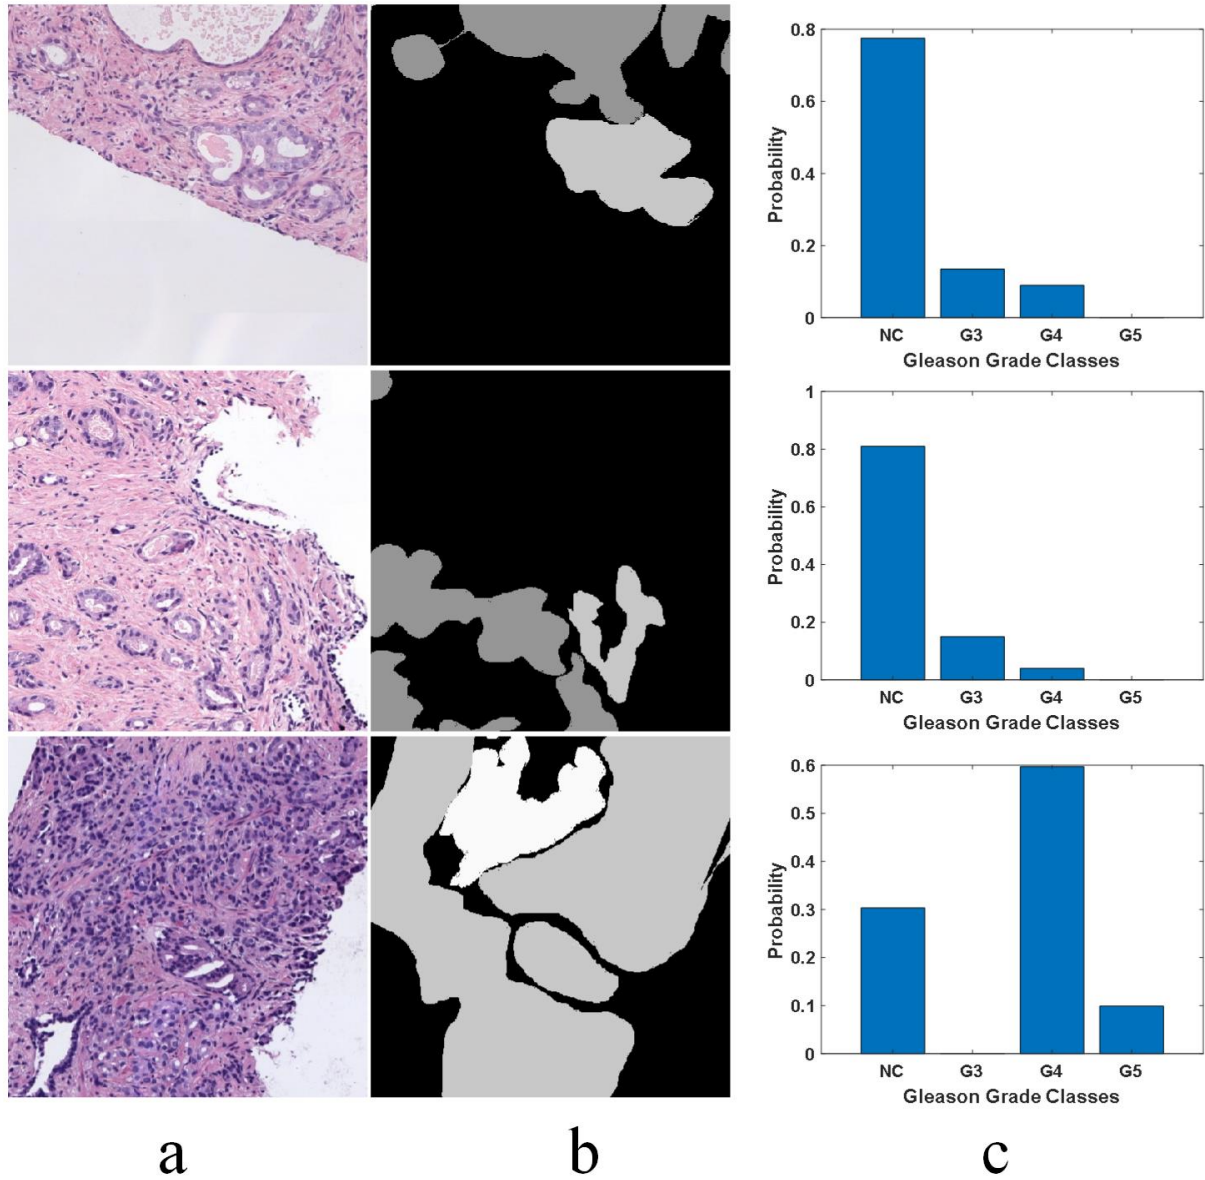

a

b

c

1

2

3

4

5

Figure 1. Examples of misclassified pixels due to majority voting-based labelling in SICAPv2 dataset. The pixels belonging to the minority class don't get acknowledged separately (a) RGB Patch; (b) Labelling Mask; (c) Probability distribution estimate of the grades/classes represented in the Mask

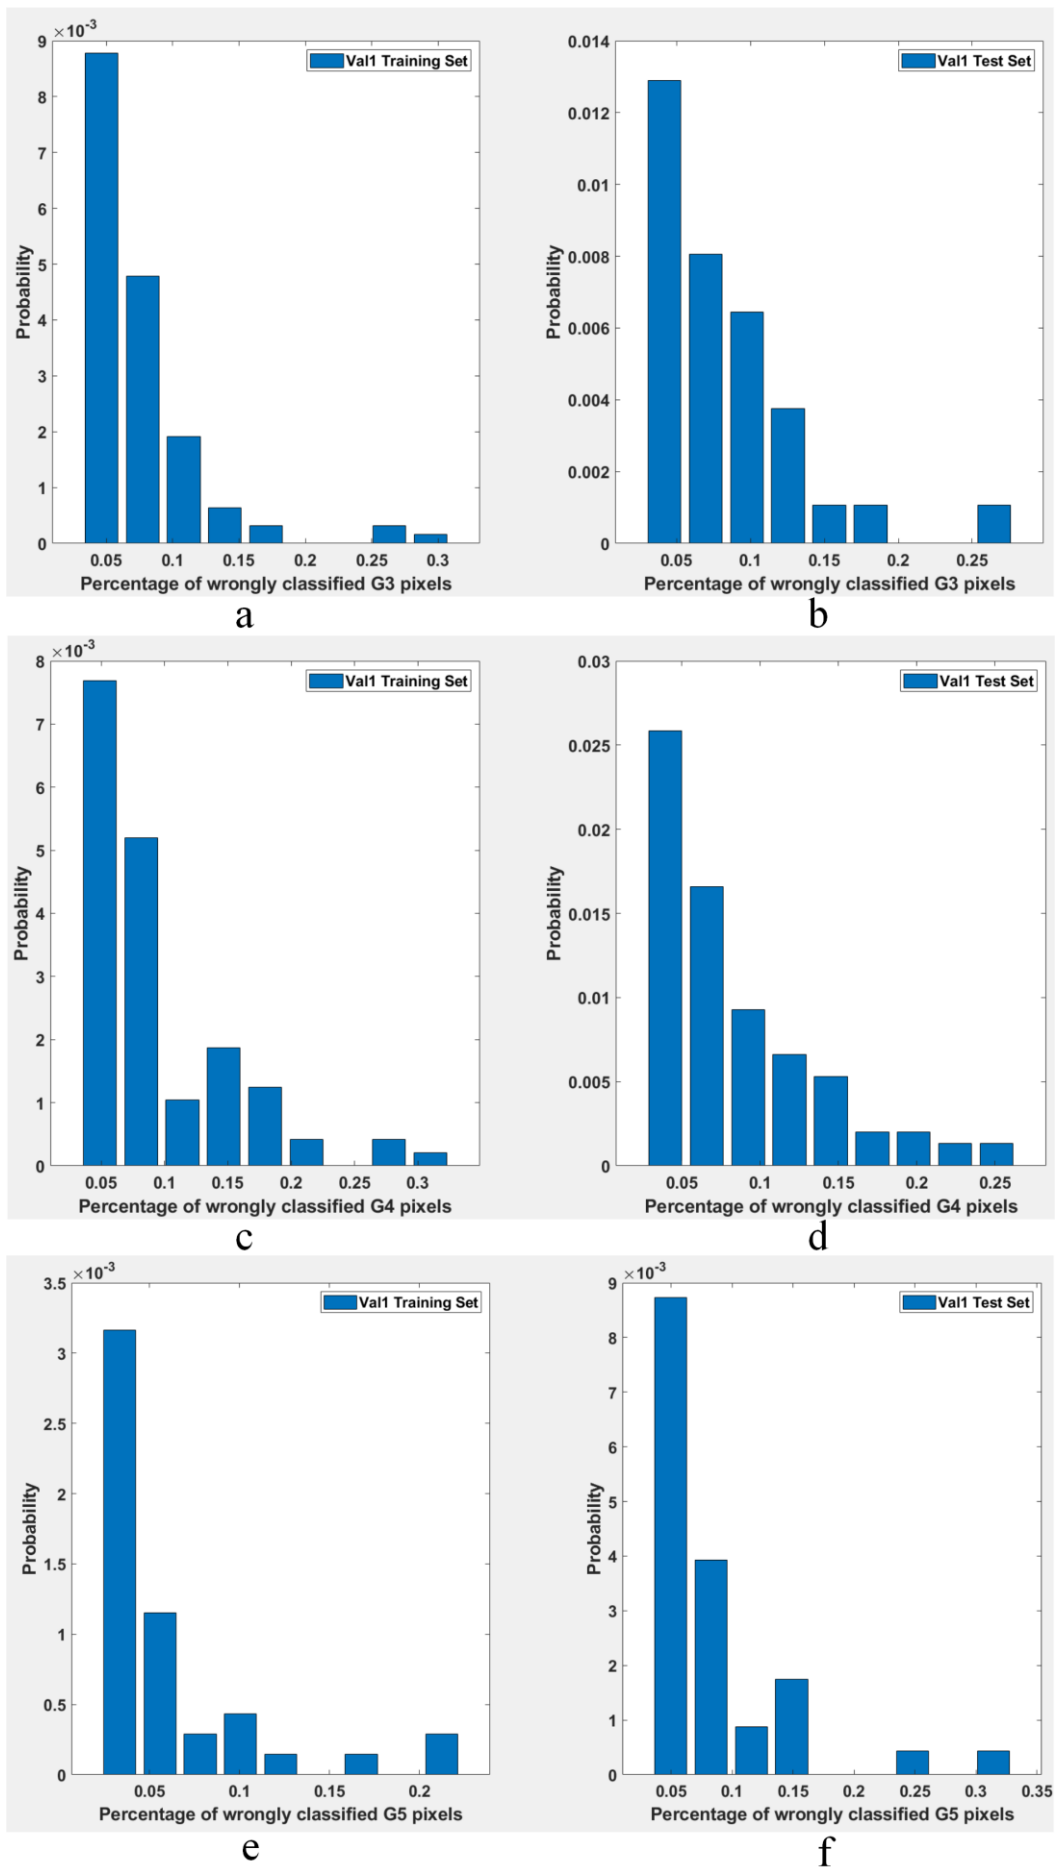

6

7

Figure 2. Probability distributions of misclassified pixel belonging to different classes in SICAPv2 dataset

8

partition 'Val1' (a) G3 training; (b) G3 test; (c) G4 test; (d) G4 test; (e) G5 test; (f) G5 test

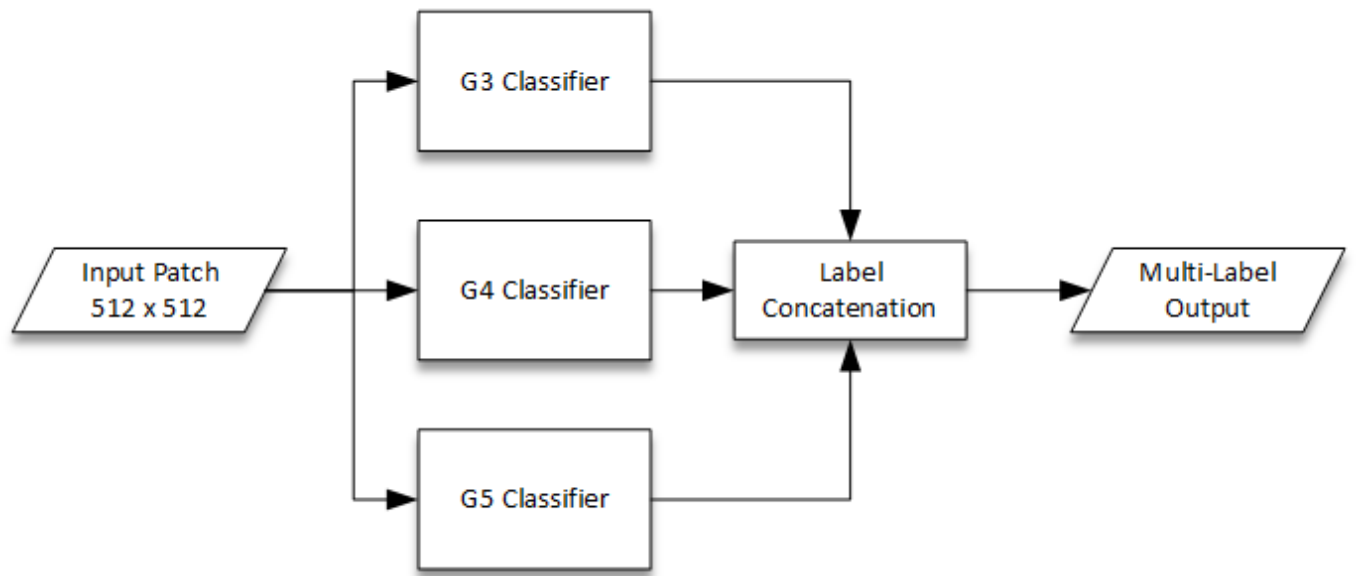

9

10

**Figure 3. Proposed ensemble classifier with individual CNN-based one-vs-all binary classifiers**

11

12

13

14



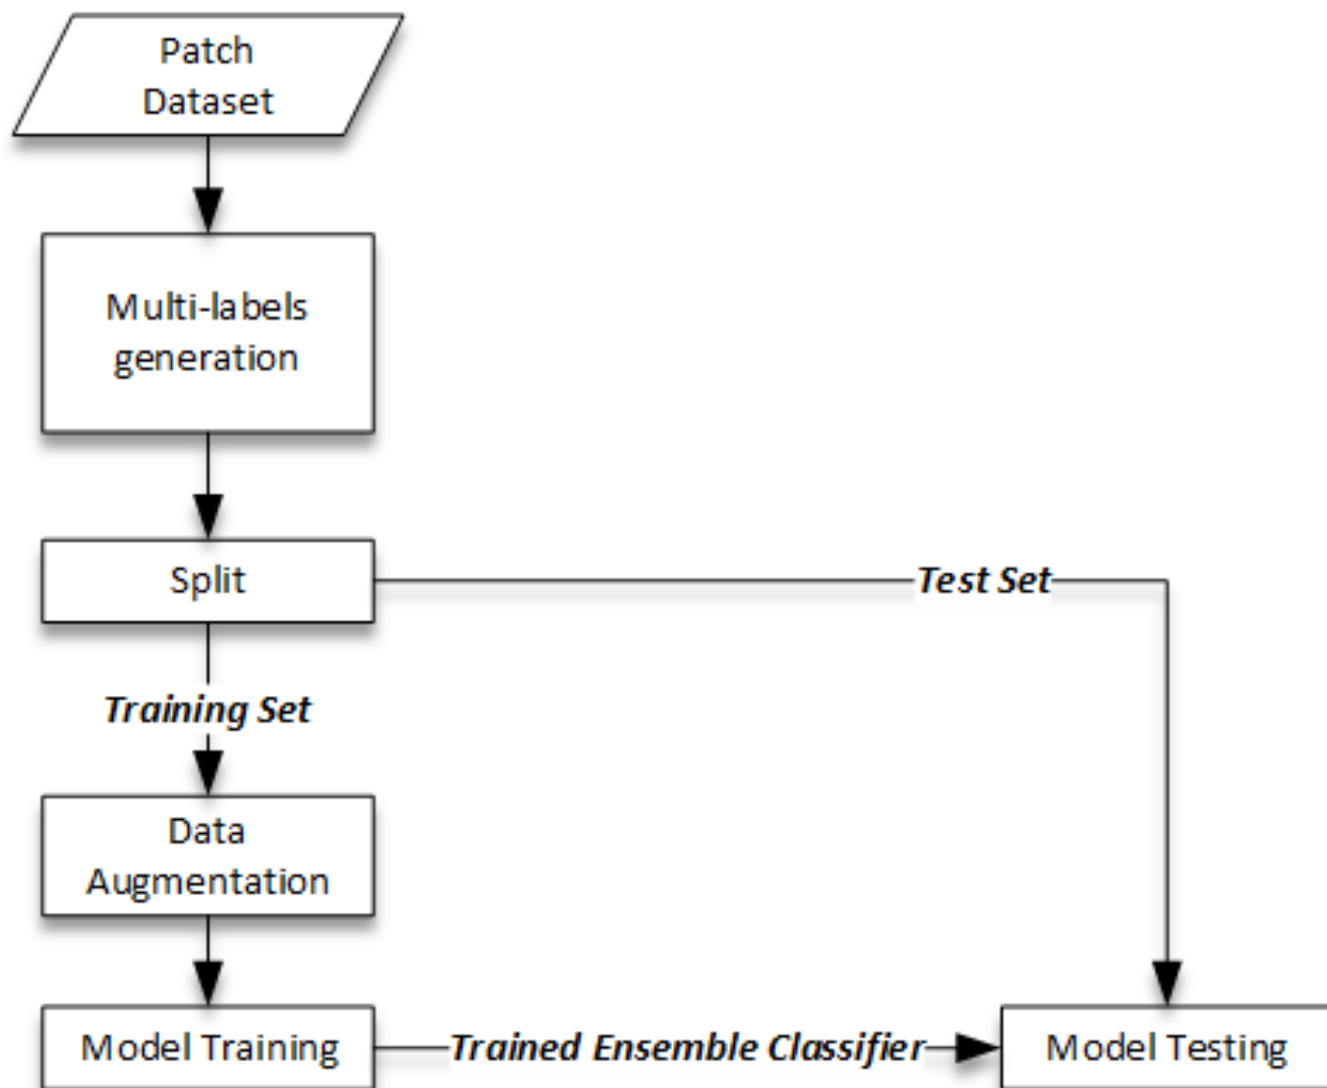

Figure 4. Training and testing paradigm for the proposed multi-label ensemble classifiers

15

16

17

18

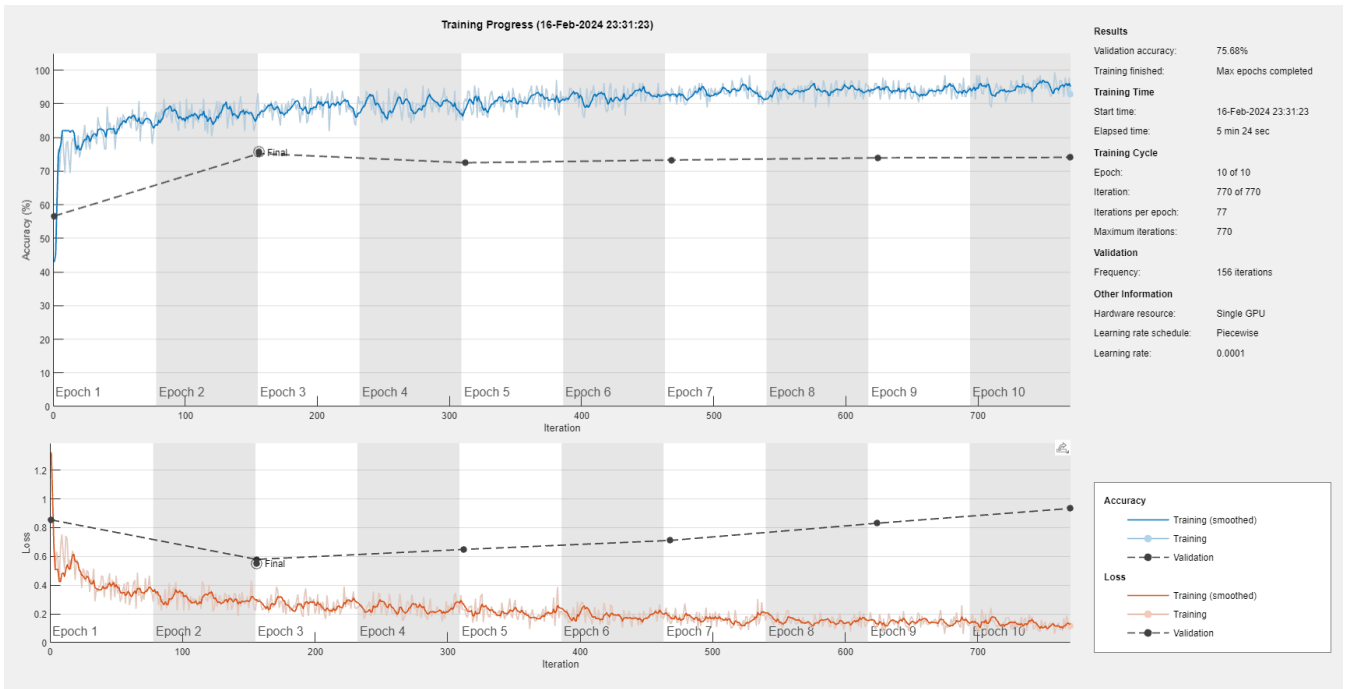

19

20

**Figure 5. Overfitting observed with ResNet18 CNN as sub-classifier for G3 grade classification in 'Val1' training set**

21

22

23

24

25

26

27

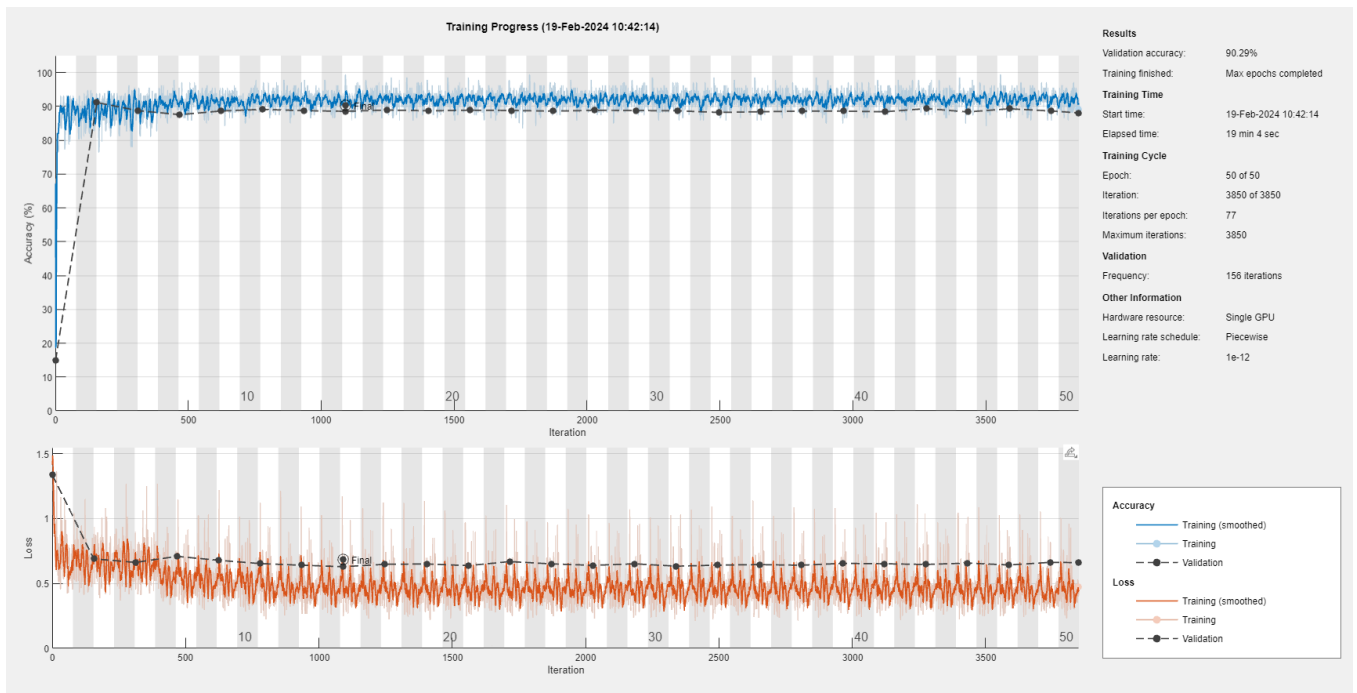

28

29

**Figure 6. Training loss curves for the proposed CNN architecture as sub-classifier for G3 grade classification in 'Val1' training set after hyperparameter optimization**

30

31

32

33

34

35

36

37

38

39

40

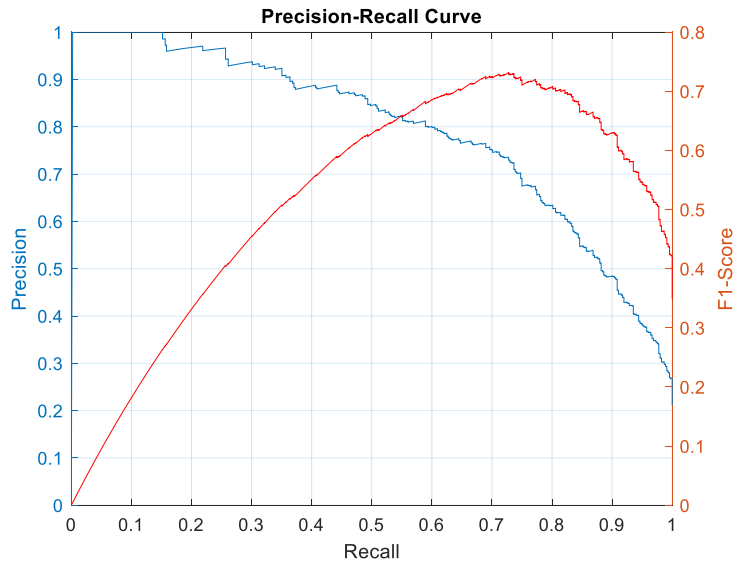

a

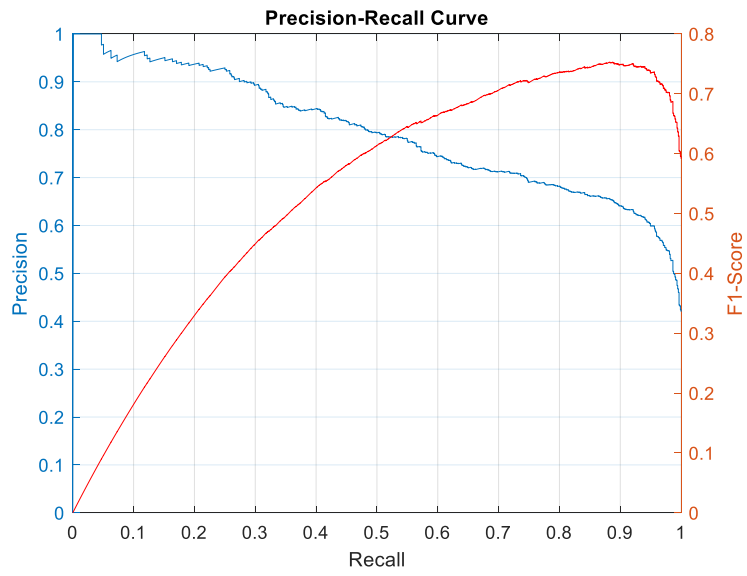

b

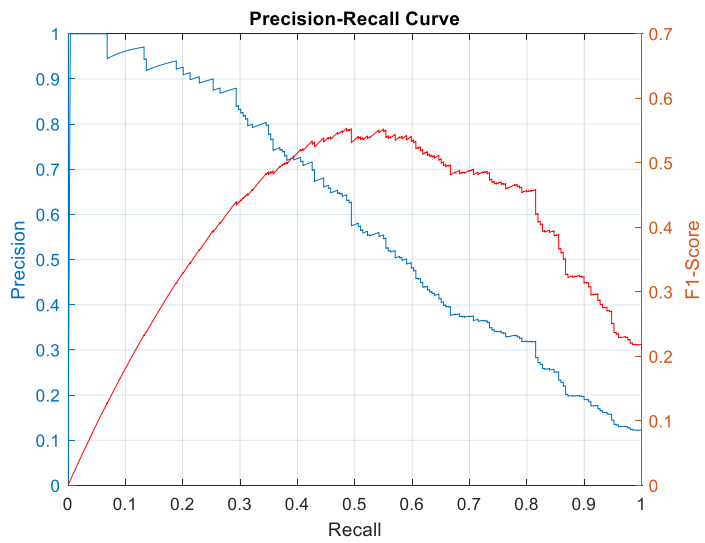

c

Figure 7. Precision-Recall and F1-Score curves for the sub-classifiers in the ensemble detector on SICAPv2 'test' set (a) G3 (b) G4 (c) G5

41

42

43

44

45

46

47

48

49

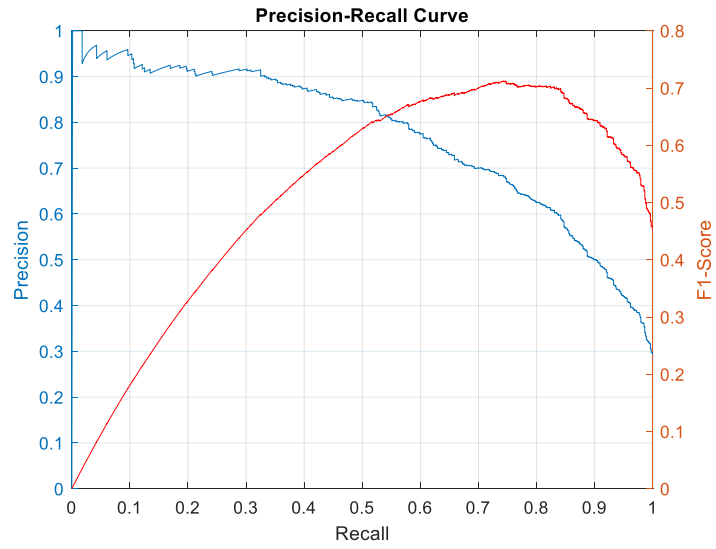

a

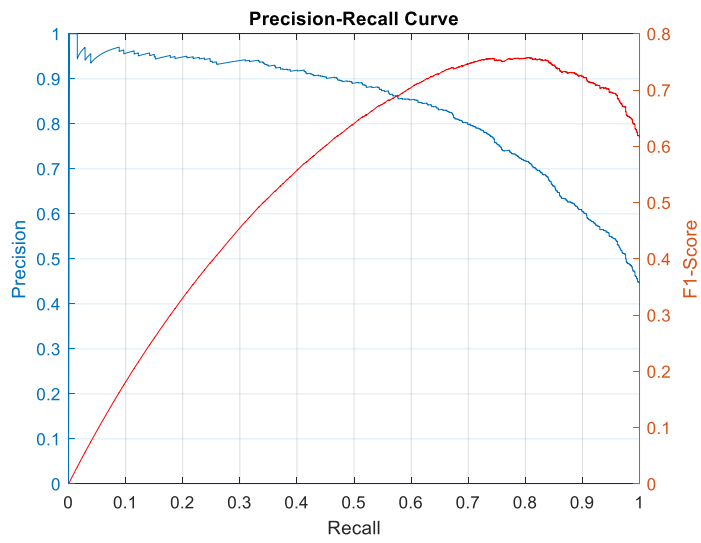

b

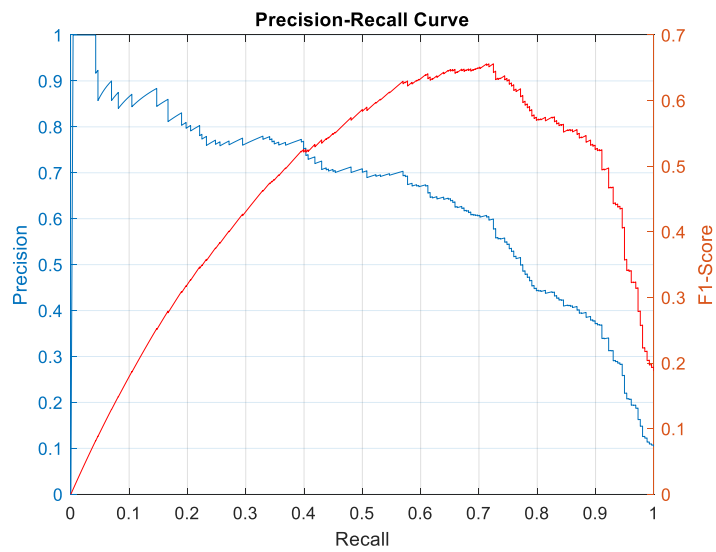

c

Figure 8. Precision-Recall and F1-Score curves for the sub-classifiers in the ensemble detector on SICAPv2 'val1' set (a) G3 (b) G4 (c) G5

50

51

52

53

54

55

56

57

58

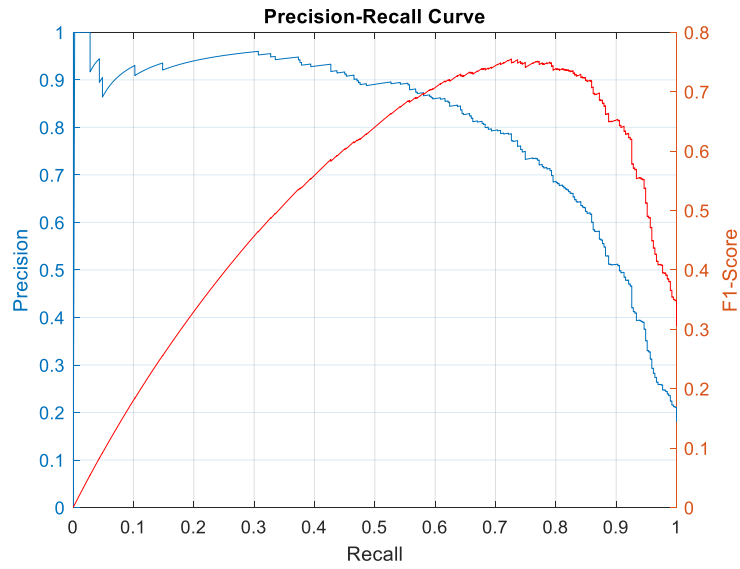

a

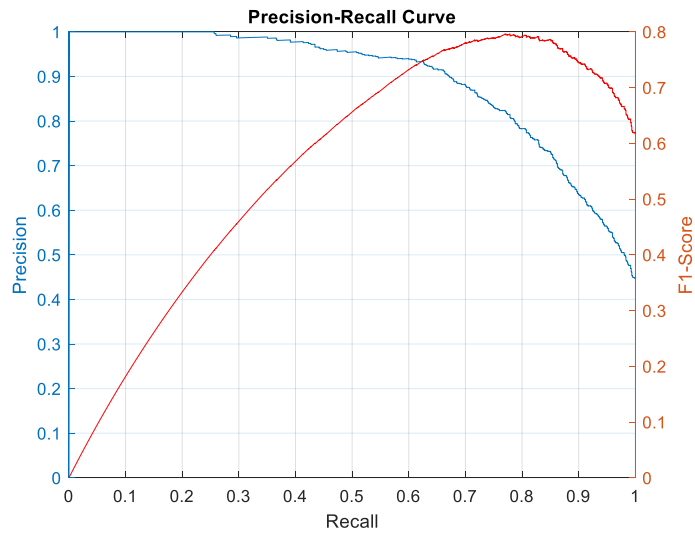

b

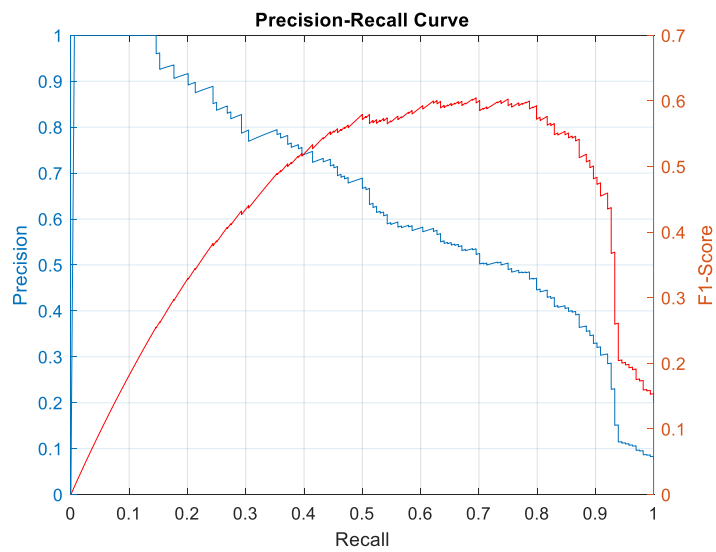

c

Figure 9. Precision-Recall and F1-Score curves for the sub-classifiers in the ensemble detector on SICAPv2 'val2' set (a) G3 (b) G4 (c) G5

59

60

61

62

63

64

65

66

67

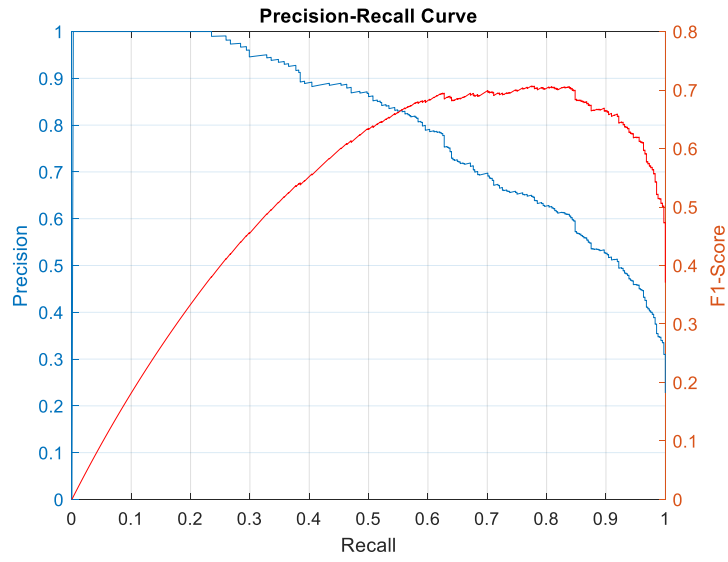

a

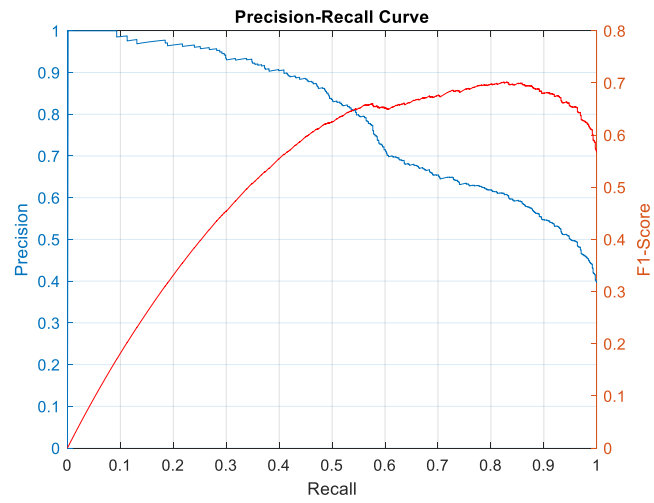

b

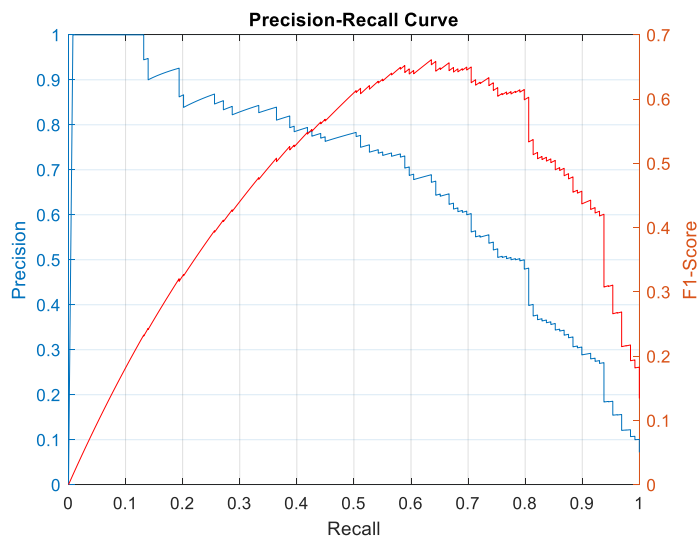

c

Figure 10. Precision-Recall and F1-Score curves for the sub-classifiers in the ensemble detector on SICAPv2 'val3' set (a) G3 (b) G4 (c) G5

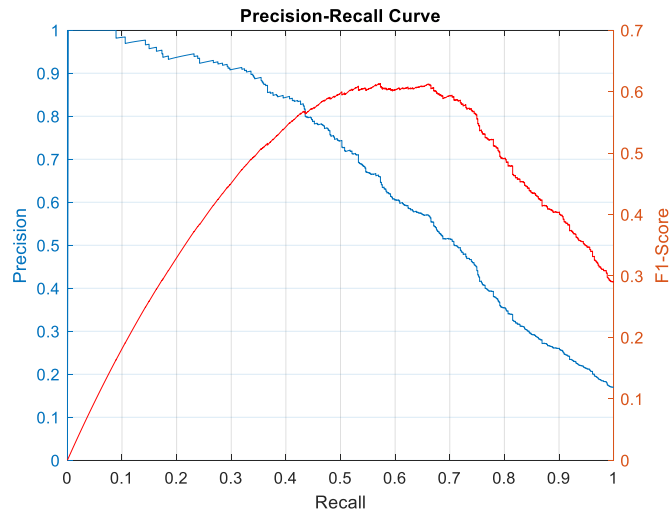

**a**

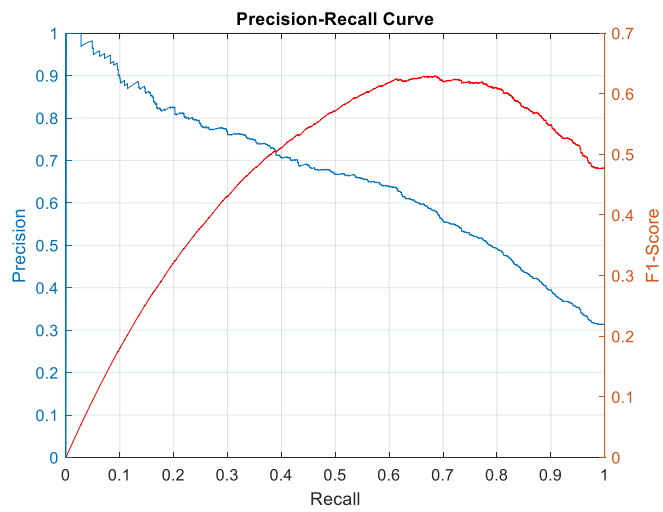

**b**

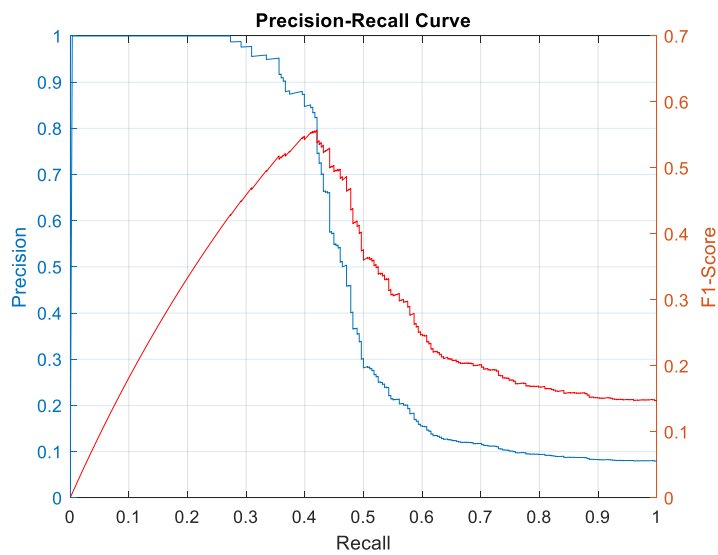

**c**

**Figure 11. Precision-Recall and F1-Score curves for the sub-classifiers in the ensemble detector on SICAPv2 'val4' set (a) G3 (b) G4 (c) G5**

78

79

80

81

82

83

84

85

86

87



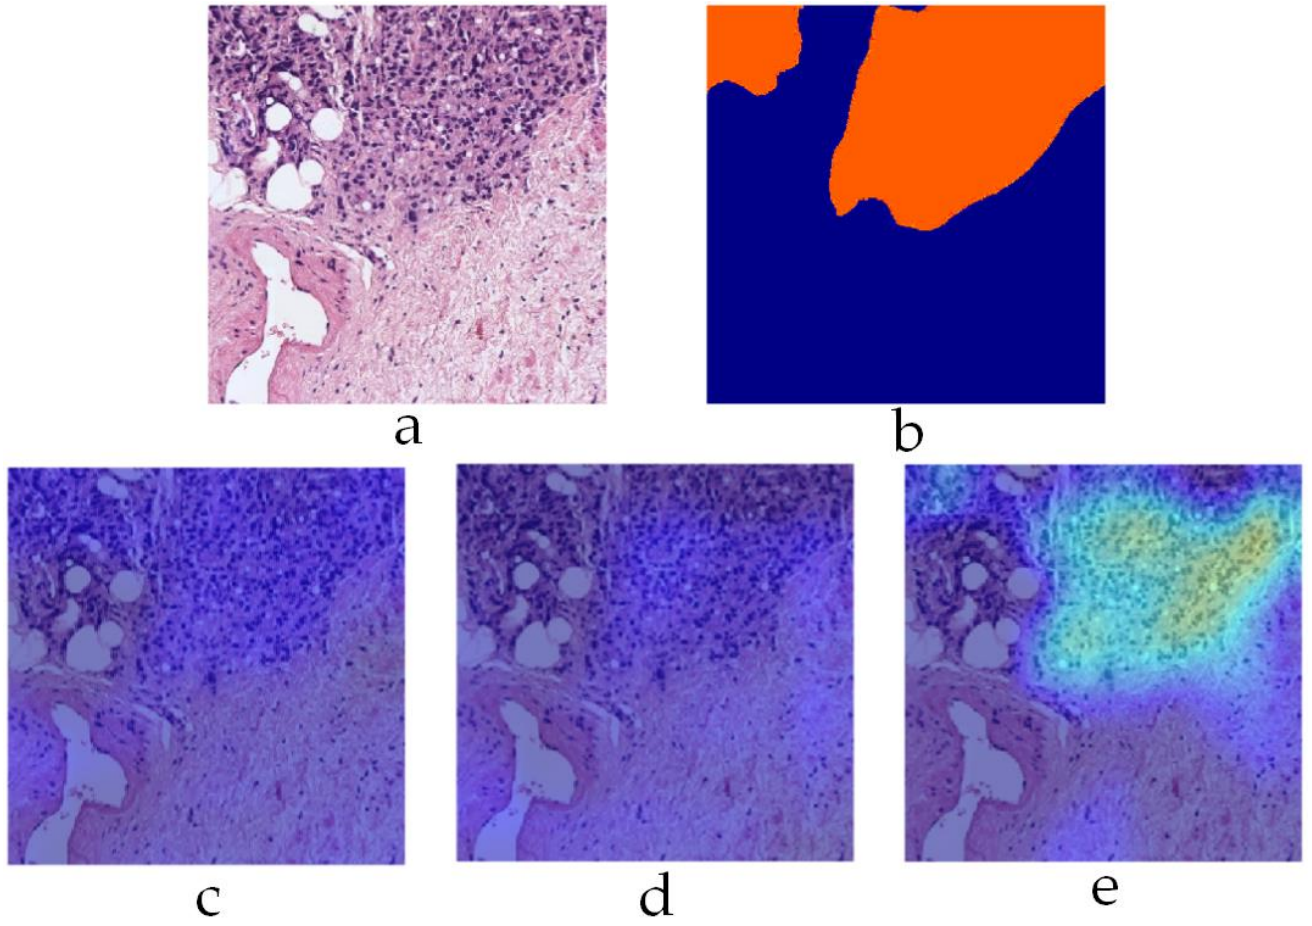

Figure 12. Grad-CAM visualization on example 1 a) input patch b) label mask c) G3 sub-classifier heat map d) G4 sub-classifier heat map e) G5 sub-classifier heat map

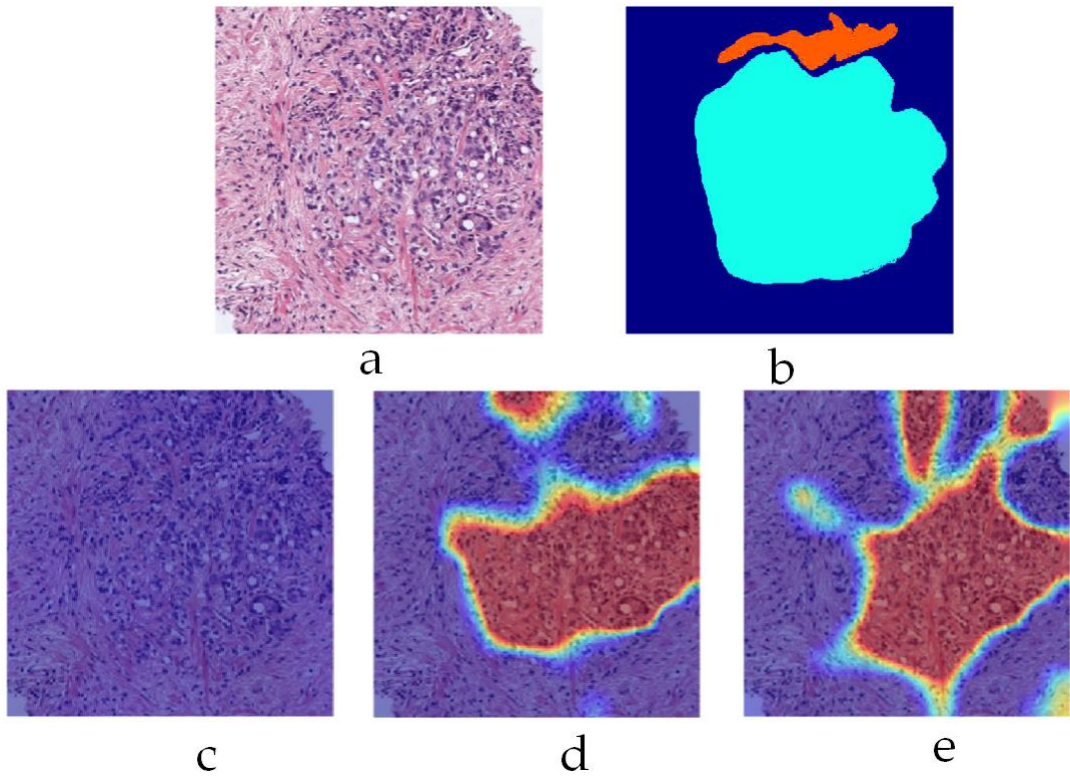

94  
95 **Figure 13. Grad-CAM visualization on example 2 a) input patch b) label mask c) G3 sub-classifier heat map d)**  
96 **G4 sub-classifier heat map e) G5 sub-classifier heat map**  
97  
98

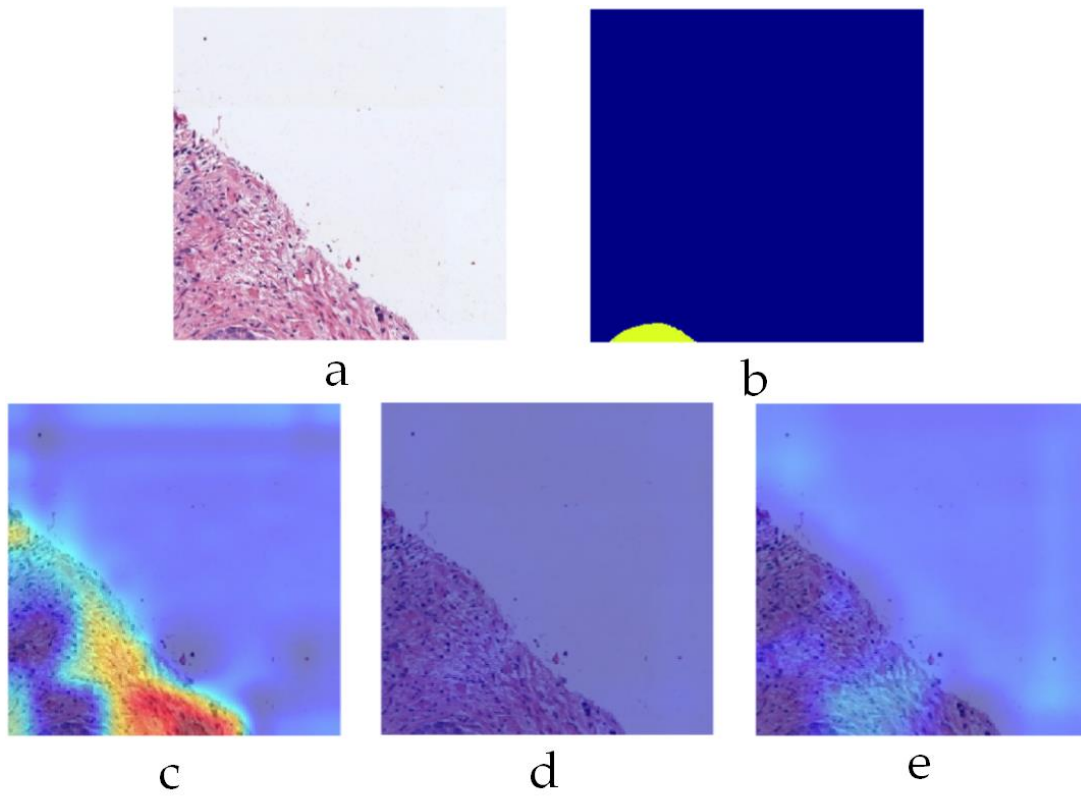

Figure 14. Grad-CAM visualization on example 3 a) input patch b) label mask c) G3 sub-classifier heat map d) G4 sub-classifier heat map e) G5 sub-classifier heat map

Figure 15 shows the corresponding activation maps for the proposed classifier on a whole biopsy slide with Gleason grades labelled G4 and G5 as primary and secondary respectively.

99  
100  
101  
102  
103

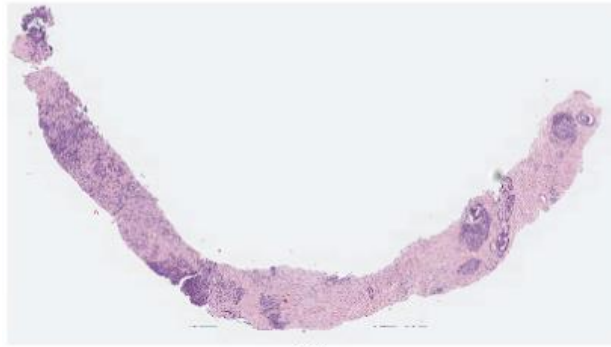

a

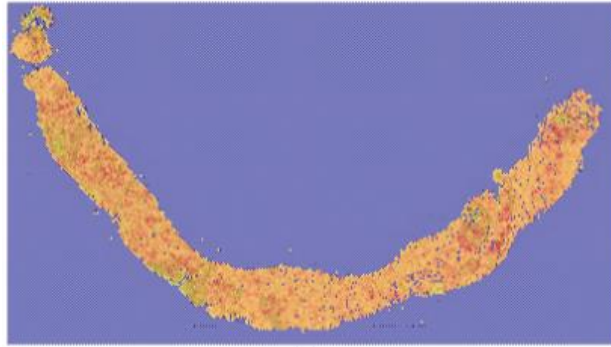

b

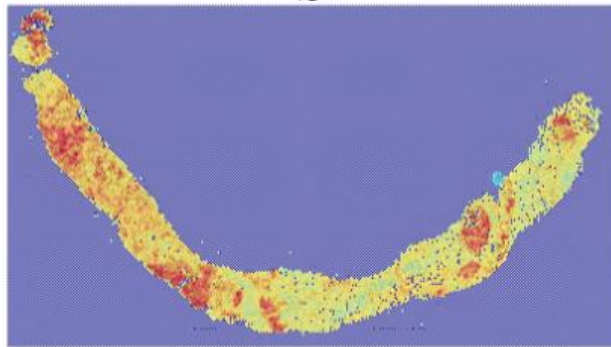

c

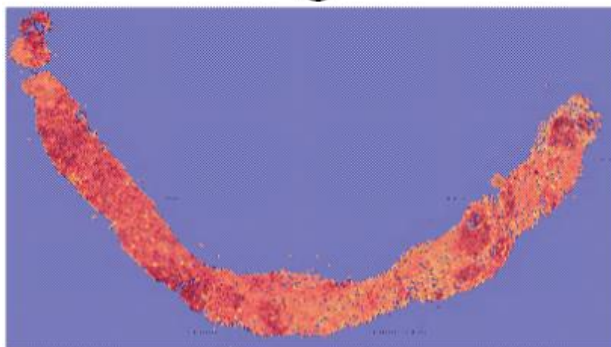

d

Figure 15. Activation maps on a WSI example a) Input image b) G3 c) G4 d) G5

## 5. Discussion

104

105

106
